# Why do species get a thin slice of $\pi$ ? Revisiting Lewontin's Paradox of Variation

Vince Buffalo

University of Oregon, Institute of Ecology and Evolution  
Eugene, Oregon  
vsbuffalo@gmail.com

February 3, 2021

## Abstract

Under neutral theory, the level of polymorphism in an equilibrium population is expected to increase with population size. However, observed levels of diversity across metazoans vary only two orders of magnitude, while census population sizes ( $N_c$ ) are expected to vary over several. This unexpectedly narrow range of diversity is a longstanding enigma in evolutionary genetics known as Lewontin's Paradox of Variation (1974). Since Lewontin's observation, it has been argued that selection constrains diversity across species, yet tests of this hypothesis seem to fall short of explaining the orders-of-magnitude reduction in diversity observed in nature. In this work, I revisit Lewontin's Paradox and assess whether current models of linked selection are likely to constrain diversity to this extent. To quantify the discrepancy between pairwise diversity and census population sizes across species, I combine genetic data from 172 metazoan taxa with estimates of census sizes from geographic occurrence data and population densities estimated from body mass. Next, I fit the relationship between previously-published estimates of genomic diversity and these approximate census sizes to quantify Lewontin's Paradox. While previous across-taxa population genetic studies have avoided accounting for phylogenetic non-independence, I use phylogenetic comparative methods to investigate the diversity census size relationship, estimate phylogenetic signal, and explore how diversity changes along the phylogeny. I consider whether the reduction in diversity predicted by models of recurrent hitchhiking and background selection could explain the observed pattern of diversity across species. Since the impact of linked selection is mediated by recombination map length, I also investigate how map lengths vary with census sizes. I find species with large census sizes have shorter map lengths, leading these species to experience greater reductions in diversity due to linked selection. Even after using high estimates of the strength of sweeps and background selection, I find linked selection likely cannot explain the shortfall between predicted and observed diversity levels across metazoan species. Furthermore, the predicted diversity under linked selection does not fit the observed diversity-census-size relationship, implying that processes other than background selection and recurrent hitchhiking must be limiting diversity.

A longstanding mystery in evolutionary genetics is that the observed levels of genetic variation across sexual species are confined to an unexpectedly narrow range. Under neutral theory, the average number of nucleotide differences between lineages (pairwise diversity,  $\pi$ ) is determined by the balance of new mutations and their loss by genetic drift (Kimura and Crow 1964; Malécot 1948; Wright 1931). In particular, the expected diversity at neutral sites in a panmictic population of  $N_c$

40 diploids is expected to be  $\pi \approx 4N_c\mu$ , where  $\mu$  is per generation mutation rate. Given that metazoan  
41 germline mutation rates only differ 10-fold ( $10^{-8}$ – $10^{-9}$ , Kondrashov and Kondrashov 2010; Lynch  
42 2010), and census sizes vary over several orders of magnitude, one would expect under neutral  
43 theory that heterozygosity should also vary over several orders of magnitude. However, early  
44 allozyme surveys revealed that heterozygosity levels across a wide range of species varied just an  
45 order of magnitude (Lewontin 1974, p. 208); this anomaly is known as Lewontin’s “Paradox of  
46 Variation”. With modern sequencing-based estimates of  $\pi$  across taxa ranging over only three  
47 orders of magnitude (0.01–10%, Leffler et al. 2012), Lewontin’s paradox has persisted unresolved  
48 through the genomics era.

49 From the beginning, explanations for Lewontin’s Paradox have been framed in terms of the  
50 neutralist–selectionist controversy (Gillespie 1991, 2001; Kimura 1984; Lewontin 1974). The neu-  
51 tralist view is that beneficial alleles are sufficiently rare and deleterious alleles removed sufficiently  
52 quickly, that levels of genetic diversity are shaped predominantly by genetic drift and mutation  
53 (Kimura 1984). Specifically, *non-selective* processes decouple the effective population size implied  
54 by observed levels of diversity  $\hat{\pi}$ ,  $\tilde{N}_e = \hat{\pi}/4\mu$ , from the census size,  $N_c$ . By contrast, the selectionist  
55 view is that the direct and indirect effects of linked selection suppress diversity levels across taxa,  
56 specifically because the impact of linked selection is greater in large populations. Undoubtedly,  
57 these opposing views represent a false dichotomy, as population genomic studies have uncovered  
58 complex demographic histories that impact diversity within a species (e.g. Palkopoulou et al. 2015;  
59 Zhao et al. 2013), as well as evidence that selection depresses genome-wide diversity (e.g. Aguade  
60 et al. 1989; Begun and Aquadro 1992; Elyashiv et al. 2016; McVicker et al. 2009).

## 61 Possible Explanations of Lewontin’s Paradox

62 A resolution of Lewontin’s Paradox would involve a mechanistic description and quantification  
63 of the evolutionary processes that prevent diversity from scaling with census sizes across species.  
64 This would necessarily connect to the broader literature on the empirical relationship between  
65 diversity and population size (Frankham 1996; Nei and Graur 1984; Soulé 1976), and the ecological  
66 and life history correlates of genetic diversity (Nevo 1978; Nevo et al. 1984; Powell 1975). Three  
67 categories of processes stand out as potentially capable of decoupling census sizes from diversity:  
68 non-equilibrium demography, variance and skew in reproductive success, and selective processes.

69 It has long been appreciated that effective population sizes are typically less than census popu-  
70 lation sizes, tracing back to early debates between R.A. Fisher and Sewall Wright (Fisher and Ford  
71 1947; Wright 1948). Possible causes of this divergence between effective and census population sizes  
72 include demographic history (e.g. population bottlenecks), extinction and recolonization dynamics,  
73 or the breeding structure of populations (e.g. the variance in reproductive success and population  
74 substructure). Early explanations for Lewontin’s Paradox suggested bottlenecks during the last  
75 glacial maximum severely reduced population sizes (Kimura 1984; Nei and Graur 1984; Ohta and  
76 Kimura 1973), and emphasized that large populations recover to equilibrium diversity levels more  
77 slowly (Nei and Graur 1984, Kimura 1984 p. 203-204). Another explanation is that cosmopolitan  
78 species repeatedly endure extinction and recolonization events, which reduces effective population  
79 size (Maruyama and Kimura 1980; Slatkin 1977).

80 While chance demographic events like bottlenecks and recent expansions have long-term impacts  
81 on diversity (equilibrium is reached on the order of size of the population), characteristics of the  
82 breeding structure such as high variance ( $V_w$ ) or skew in reproductive success also suppress diversity  
83 below the levels predicted by the census size (Wright 1938). In species like marine animals, females

84 are highly fecund, and dispersing larvae face extremely low survivorship, leading to high variance in  
85 reproductive success (Hauser and Carvalho 2008; Hedgecock and Pudovkin 2011; Waples et al. 2018,  
86 2013). Such “sweepstakes” reproductive systems can lead to remarkably small ratios of effective  
87 population size to census population size (e.g.  $N_e/N_c$  can range from  $10^{-6}$ – $10^{-2}$ ), since  $N_e/N \approx$   
88  $1/V_w$  (Hedgecock 1994; Nunney 1993, 1996; Wright 1938), and require multiple-merger coalescent  
89 processes to describe their genealogies (Eldon and Wakeley 2006). Overall, these reproductive  
90 systems diminish the diversity in many species, but seem unlikely to explain Lewontin’s Paradox  
91 broadly across metazoans.

92 Alternatively, selective processes, and in particular the indirect effects of selection on linked  
93 neutral variation, could explain the observed narrow range of diversity. The earliest mathematical  
94 model of hitchhiking was proffered as a solution to Lewontin’s Paradox (Maynard Smith and Haigh  
95 1974). Since, empirical observations have demonstrated that linked selection shapes patterns of  
96 genome-wide diversity, as evidenced by the correlation between recombination and diversity in a  
97 variety of species (Aguade et al. 1989; Begun and Aquadro 1992; Cai et al. 2009; Cutter and Payseur  
98 2003; Stephan and Langley 1998). Theoretic work to explain this pattern has considered diversity  
99 under a steady influx of new beneficial mutations (recurrent hitchhiking; Stephan 1995; Stephan  
100 et al. 1992), and purifying selection against new deleterious mutations (background selection, BGS;  
101 Charlesworth et al. 1993; Hudson and Kaplan 1995; Hudson and Kaplan 1994; Nordborg et al.  
102 1996). Indeed, empirical work indicates background selection diminishes diversity around genic  
103 regions in a variety of species (Charlesworth 1996; Hernandez et al. 2011; McVicker et al. 2009),  
104 and now efforts have shifted towards teasing apart the effects of positive and negative selection on  
105 genomic diversity (Elyashiv et al. 2016).

106 An important class of theoretic selection models pertaining to Lewontin’s Paradox are recur-  
107 rent hitchhiking models that decouple diversity from the census population size. These models  
108 predict diversity when strongly selected beneficial mutations regularly enter and sweep through the  
109 population, trapping lineages and forcing them to coalesce (Gillespie 2000; Kaplan et al. 1989).  
110 In general, decoupling occurs under these hitchhiking models when the rate of coalescence due to  
111 selection is much greater than the rate of neutral coalescence (Coop and Ralph 2012, equation  
112 22). Other selection models cannot alone decouple diversity from population size, *ceteris paribus*.  
113 For example, the reduction in diversity predicted under background selection and polygenic fitness  
114 variation is a proportion reduction in population size, mediated by the total recombination map  
115 length (Charlesworth et al. 1993; Nicolaisen and Desai 2012; Nordborg et al. 1996; Robertson 1961;  
116 Santiago and Caballero 1995, 1998).

## 117 Recent Approaches Towards Solving Lewontin’s Paradox

118 Recently, Corbett-Detig et al. (2015) used population genomic data to estimate the reduction in  
119 diversity due to background selection and hitchhiking across 40 species, and showed the impact of  
120 selection increases with two proxies of census population size, species range and with body size.  
121 These authors argued this is evidence that selection could explain Lewontin’s Paradox; however, in  
122 a re-analysis, Coop (2016) demonstrated that the observed scale of these reductions is insufficient to  
123 explain the orders-of-magnitude shortfall between observed and expected levels of diversity across  
124 species. Other recent work has found that certain life history characteristics related to parental  
125 investment, such as propagule size, are good predictors diversity in animals (Chen et al. 2017;  
126 Romiguier et al. 2014). Nevertheless, while these diversity correlates are important clues, they do  
127 not propose a mechanism by which these traits act to constrain diversity within a few orders of

128 magnitude.

129 Here, I revisit Lewontin’s Paradox by integrating a variety of data sets and assessing the pre-  
130 dicted reductions in diversity under different selection models. Prior surveys of genetic diversity  
131 either lacked census population size estimates, used allozyme-based measures of heterozygosity, or  
132 included fewer species. To address these shortcomings, I first estimate census sizes by combining  
133 predictions of population density based on body size with ranges estimated from geographic occur-  
134 rence data. Using these estimates, I quantify the relationship between census size and previously-  
135 published genomic diversity estimates across 172 metazoan taxa within nine phyla, which provides  
136 a sense of the scale of the divergence between  $\pi$  and  $N_c$  that leads to Lewontin’s Paradox.

137 Past work looking at the relationship between  $\pi$  and  $N_c$  has largely ignored phylogenetic non-  
138 independence across taxa (Felsenstein 1985). To address this shortcoming, I account for phyloge-  
139 netic non-independence across taxa using a synthetic time-calibrated phylogeny and phylogenetic  
140 comparative methods (PCMs). Moreover, Lynch (2011) has argued that since coalescent times  
141 are much less than divergence times, considering phylogenetic non-independence is unnecessary for  
142 traits like effective population size. Using PCMs, I test this conjecture by estimating phylogenetic  
143 signal in the diversity census size relationship, and investigating how these traits evolve along the  
144 phylogeny.

145 Finally, I explore whether the predicted reductions of diversity under background selection and  
146 recurrent hitchhiking are sufficiently strong enough to resolve Lewontin’s Paradox. These predicted  
147 reductions in diversity across species are generously estimated using selection strength parameters  
148 from *Drosophila melanogaster*, a species known to be strongly affected by linked selection. Given  
149 the effects of linked selection are mediated by recombination map length, I investigate how re-  
150 combination map lengths vary with census population size using data from a previously-published  
151 survey (Stapley et al. 2017). I find map lengths are typically shorter in large-census-size species,  
152 increasing the effects of linked selection in these species, which might further decouple diversity  
153 from census size. Still, I find the combined impact of these selection models with available pa-  
154 rameter estimates falls short in explaining Lewontin’s Paradox, and discuss future avenues through  
155 which the Paradox of Variation could be fully resolved.

## 156 Results

### 157 Estimates of Census Population Size

158 A major impediment in quantifying Lewontin’s Paradox has been estimating census population sizes  
159 across many taxa, especially for extremely abundant, cosmopolitan species that define the upper  
160 limit of ranges. Previous work has surveyed the literature for census size estimates (Frankham 1996;  
161 Nei and Graur 1984; Soulé 1976), or used range and body size or qualitative categories as proxies  
162 for census size (Corbett-Detig et al. 2015; Leffler et al. 2012). To quantify the relationship between  
163 genomic estimates of diversity and census population sizes, I first approximate census population  
164 sizes for 172 metazoan taxa (Figure 1). My approach predicts population densities from body sizes  
165 using a previously-observed linear relationship that holds across metazoans (Supplementary Figure  
166 S8; Damuth 1981, 1987). Then, from geographic occurrence data, I estimate range sizes. Finally, I  
167 estimate population size as the product of these predicted densities and range estimates (see Meth-  
168 ods: *Macroecological Estimates of Population Size*). Note that the relationship between population  
169 density and body size is driven by energy budgets, and thus reflects macroecological equilibria

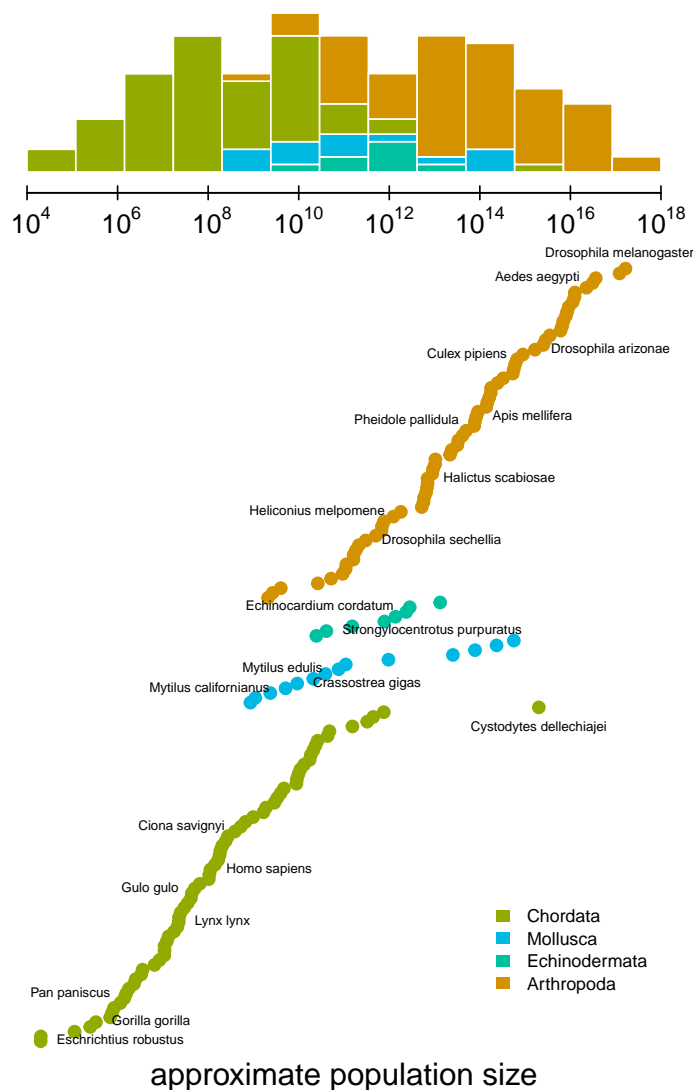

**Figure 1:** The distribution of approximate census population sizes estimated by this study. Some phyla containing few species were excluded for clarity.

170 (Damuth 1987); consequently, population sizes for taxa like humans and their domesticated species  
 171 are underestimated. While these methods to estimate census size are crude and approximate, they  
 172 can be efficiently calculated for numerous taxa and are sufficient to estimate the scale of Lewontin's  
 173 Paradox.

## 174 Quantifying Lewontin's Paradox

175 To determine which ecological or evolutionary processes could decouple diversity from census pop-  
 176 ulation size, we first need to quantify this relationship across a wide variety of taxa. Previous work  
 177 has found there is a significant relationship between heterozygosity and the logarithm of population  
 178 size, but these studies relied on heterozygosity measured from allozyme data (Frankham 1996; Nei

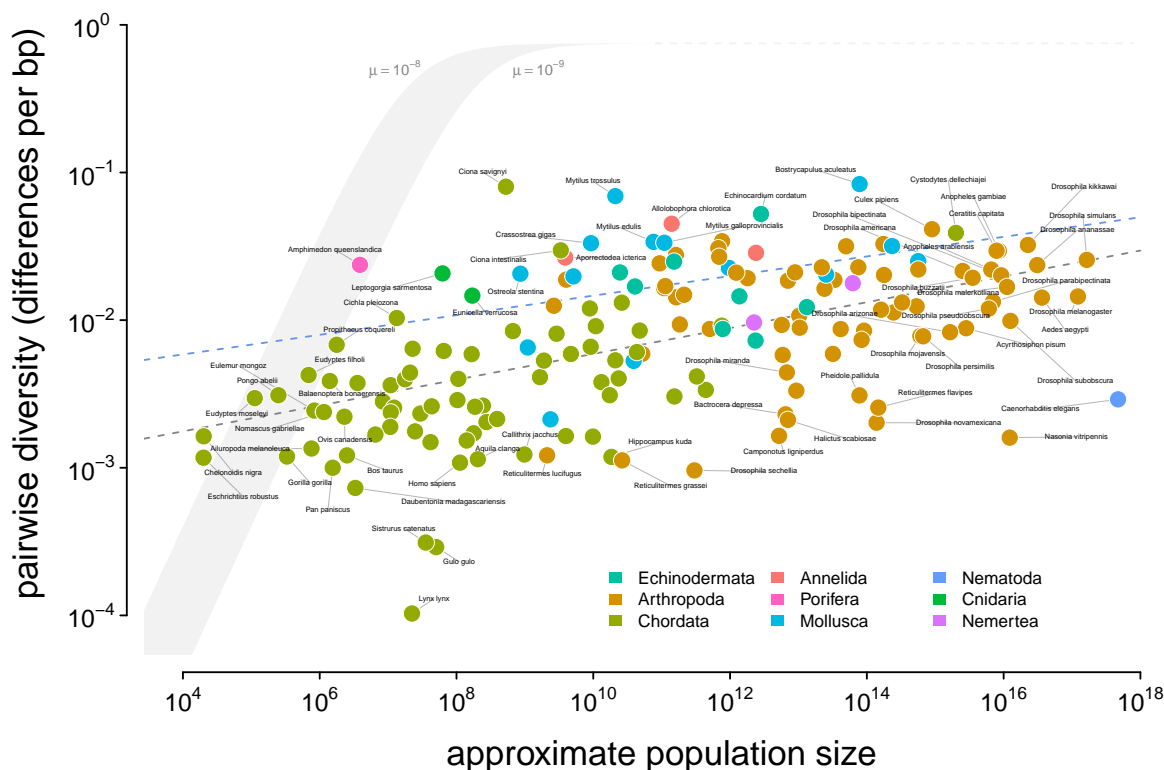

**Figure 2:** An illustration of Lewontin’s Paradox of Variation. Pairwise diversity (data from Leffler et al. 2012, Corbett-Detig et al. 2015, and Romiguier et al. 2014), which varies around three orders of magnitude, shows a weak relationship with approximate population size, which varies over 12 orders of magnitude. The shaded curve shows the range of expected neutral diversity if  $N_e$  were to equal  $N_c$  under the four-alleles model,  $\log_{10}(\pi) = \log_{10}(\theta) - \log_{10}(1 + 4\theta/3)$  where  $\theta = 4N_c\mu$ , for two mutation rates,  $\mu = 10^{-8}$  and  $\mu = 10^{-9}$ , and the light gray dashed line represents the maximum pairwise diversity under the four alleles model. The dark gray dashed line is the OLS regression fit, and the blue dashed line is the regression fit using a phylogenetic mixed-effects model. Points are colored by phylum.

179 and Graur 1984; Soulé 1976). Here, I confirm these findings using pairwise diversity estimates  
 180 from genomic sequence data and the estimated census sizes (Figure 2). The pairwise diversity  
 181 estimates are from three sources: Leffler et al. (2012), Corbett-Detig et al. (2015), and Romiguier  
 182 et al. (2014), and are predominantly from either synonymous or non-coding DNA (see Methods:  
 183 *Diversity and Map Length Data*). Overall, an ordinary least squares (OLS) relationship on a log-log  
 184 scale fits the data well (Figure 2). The OLS slope estimate is significant and implies an increase  
 185 in diversity of 0.09 differences per basepair for every order of magnitude census size grows (95%  
 186 confidence interval [0.08, 0.12]; see also the OLS fit per-phyla, Supplementary Figure S2).

187 Notably, this relationship has few outliers and is relatively homoscedastic. This is in part  
 188 because of the log-log scale, in contrast to previous work (Nei and Graur 1984; Soulé 1976); see  
 189 Supplementary Figure S1 for a version on a log-linear scale. However, it is noteworthy that few taxa  
 190 have diversity estimates below  $10^{-3.5}$  differences per basepair. Those that do, lynx (*Lynx Lynx*),  
 191 wolverine (*Gulo gulo*), and Massasauga rattlesnake (*Sistrurus catenatus*) face habitat fragmentation

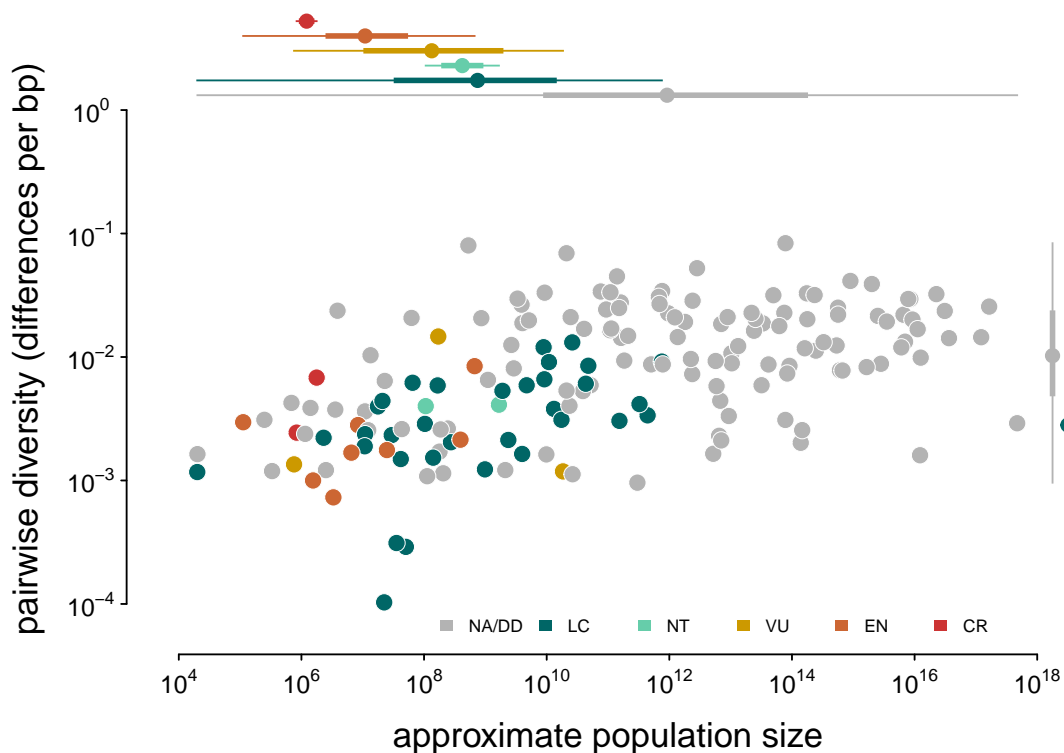

**Figure 3:** A version of Figure 2 with points colored by their IUCN Red List conservation status. Margin boxplots show the diversity and population size ranges (thin lines) and interquartile ranges (thick lines) for each category. NA/DD indicates no IUCN Red List entry, or Red List status Data Deficient; LC is Least Concern, NT is Near Threatened, VU is Vulnerable, EN is Endangered, and CR is Critically Endangered.

192 and declining population sizes. These three species are all in the IUCN Red List, but are listed as  
193 least concern (though their presence in the Red List indicates they are of conservation interest). I  
194 also investigated the relationship between species' IUCN Red List categories (an ordinal scale of  
195 how threatened a species is) and both diversity and population size, finding that species categorized  
196 as more threatened have both smaller population sizes and reduced diversity, compared to non-  
197 threatened species (Figure 3) consistent with past work (Spielman et al. 2004). A linear model  
198 of diversity regressed on population size has lower AIC when the IUCN Red List categories are  
199 included, and the estimates of the effect of IUCN status are all negative on diversity, though not all  
200 are significant in part because some categories have three or fewer species (Supplementary Table  
201 S1).

## 202 **Phylogenetic Non-Independence and the Population Size Diversity Relationship**

203 In quantifying Lewontin's Paradox, I have additionally fit some simple trait evolution models  
204 that account for phylogenetic non-independence, investigated whether there is a signal of phylo-  
205 genetic non-independence, estimated the continuous trait values on the phylogeny, and assessed  
206 how diversity and population size evolve. Prior population genetic comparative studies have lacked

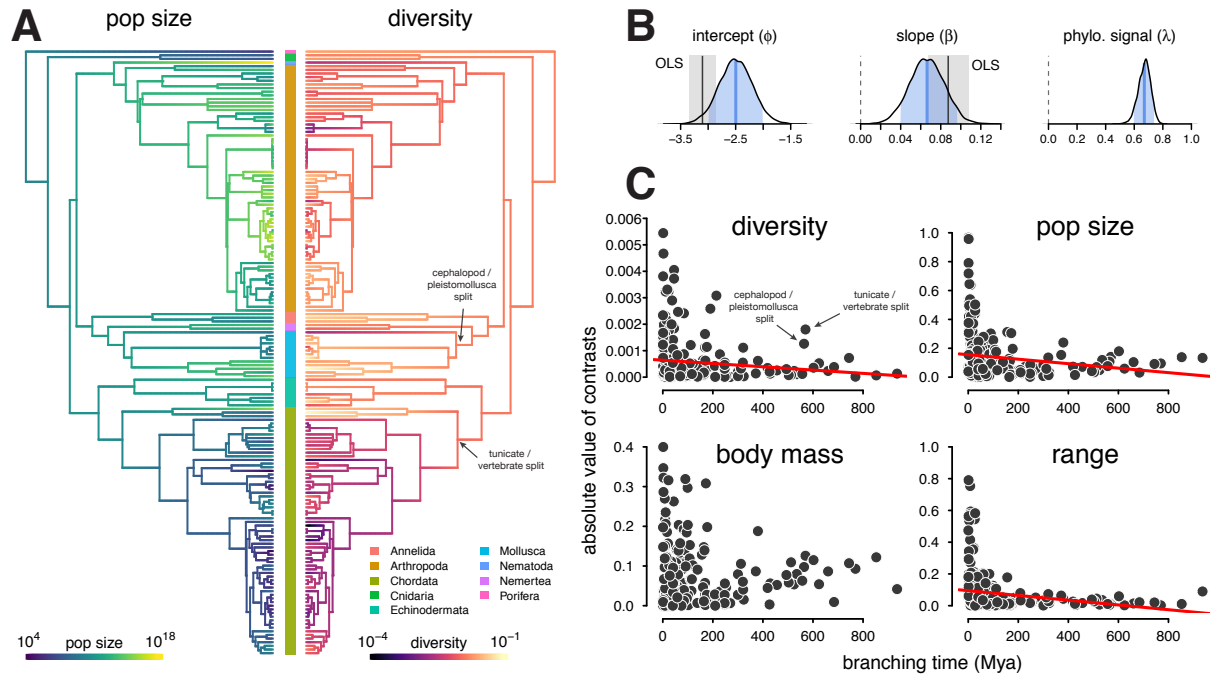

**Figure 4:** (A) The ancestral continuous trait estimates for the population size and diversity (differences per bp, log scaled) across the phylogeny of 166 taxa. The phyla of the tips are indicated by the color bar in the center. (B) The posterior distributions of the intercept, slope, and phylogenetic signal ( $\lambda$ , Vilmereuil and Nakagawa 2014) of the phylogenetic mixed-effects model of diversity and population size (log scaled). Also shown are the 90% credible interval (light blue shading), posterior mean (blue line), OLS estimate (gray solid line), and bootstrap OLS confidence intervals (light gray shading). (C) The node-height tests of diversity, population size, and the two components of the population size estimates, body mass, and range (all traits on log scale before contrast was calculated). Each point shows the standardized phylogenetic independent contrast and branching time for a pair of lineages. Red lines are robust regression estimates (and are only shown for statistically significant relationships at the  $\alpha = 0.05$  level). Note that some outlier pairs with very high phylogenetic independent contrasts were excluded (in all cases, these outliers were in the genus *Drosophila*).

207 time-calibrated phylogenies and assumed unit branch lengths (Whitney and Garland 2010), a short-  
 208 coming that has drawn criticism (Lynch 2011). Here, I use a synthetic time-calibrated phylogeny  
 209 created from the DateLife project (O’Meara et al. 2020) to account for shared phylogenetic history  
 210 (see Methods: *Phylogenetic Comparative Methods*).

211 Using a phylogenetic mixed-effects model (Hadfield and Nakagawa 2010; Lynch 1991; Ville-  
 212 mereuil and Nakagawa 2014) implemented in Stan (Carpenter et al. 2017; Stan Development Team  
 213 2020), I estimated the linear relationship between diversity and population size (on a log-log scale)  
 214 accounting for phylogeny, for the 166 taxa with non-missing data and present in the synthetic  
 215 chronogram. As with the non-phylogenetic regression, this relationship was positive and significant  
 216 (95% credible interval 0.04, 0.11), though somewhat attenuated compared to the OLS estimates  
 217 (Figure 2B). Since the population size estimates are based on range and body mass, they are es-  
 218 sentially a composite trait; fitting phylogenetic mixed-effects models separately on body mass and  
 219 range indicates these have significant negative and positive effects, respectively (Supplementary



220 Figure S3).

221 With the phylogenetic mixed-effects model, I also estimated the variance of the phylogenetic  
222 effect ( $\sigma_p^2$ ) and the residual variance ( $\sigma_r^2$ ), which can be used to estimate a measure of the phyloge-  
223 netic signal,  $\lambda = \sigma_p^2 / (\sigma_p^2 + \sigma_r^2)$  (Lynch 1991; Villemereuil and Nakagawa 2014; see Freckleton et al. 2002  
224 for a comparison to Pagel's  $\lambda$ ). If the relationship between diversity and population size was free of  
225 shared phylogenetic history,  $\lambda = 0$  and all the variance could be explained by evolution on the tips;  
226 this is analogous to Lynch's conjecture that coalescent times should be free of phylogenetic signal  
227 (2011). In the relationship between population size and diversity, the posterior mean of  $\lambda = 0.67$   
228 (90% credible interval [0.59, 0.75]) indicates that the majority of the variance perhaps might be due  
229 to shared phylogenetic history (Figure 4B).

230 A closer visual inspection of the estimated ancestral continuous values for diversity and pop-  
231 ulation size on the phylogeny indicates the high phylogenetic signal seems to be driven in part  
232 by chordates having low diversity and small population sizes compared to non-chordates (Figure  
233 4A). This suggests Gillespie's (1991) earlier critique that the  $\pi$ - $N_c$  relationship was driven by  
234 chordate-arthropod differences may be valid. This problem resembles Felsenstein's worst-case sce-  
235 nario (Felsenstein 1985; Uyeda et al. 2018), where a singular event on a lineage separating two  
236 clades generates a spurious association between two traits. To further investigate whether clade-  
237 level differences dominated the relationship between diversity and population size, I fit phylogenetic  
238 mixed-effects models to phyla-level subsets of the data for clades with sufficient sample sizes (see  
239 Methods: *Phylogenetic Comparative Methods*). This analysis shows a significant positive rela-  
240 tionship between diversity and population size in arthropods, and positive weak relationships in  
241 molluscs and chordates (Supplementary Figure S12). Each of the 90% credible intervals for slope  
242 overlap, indicating the relationship between  $\pi$  and  $N_c$  is similar across these clades.

243 One limitation of the phylogenetic mixed-effects models employed here is that they assume traits  
244 evolve under constant-rate Brownian motion. To test this assumption, I performed node-height tests  
245 (Freckleton and Harvey 2006). Node-height tests regress the absolute values of the standardized  
246 contrasts between lineages against the branching time (since present) of these lineages. Under  
247 Brownian Motion (BM), standardized contrasts are estimates of the rate of character evolution  
248 (Felsenstein 1985); if a trait evolves under constant rate BM, this relationship should be flat. For  
249 both diversity and population size, node-height tests indicate a significant increase in the rate of  
250 evolution towards the present (robust regression p-values 0.028 and 0.00070 respectively; Figure  
251 4C). Considering the constituents of the population size estimate, range and body mass, separately,  
252 range but not body mass shows a significant increase (p-value  $1.9 \times 10^{-7}$ ) in rate towards the present.

253 Interestingly, the diversity node-height test reveals two rate shifts at deeper splits (Figure 4C,  
254 top left) around 570 Mya. These nodes represent the branches between tunicates and vertebrates in  
255 chordates, and cephalopods and pleistomollusca (bivalves and gastropods) in molluscs. While the  
256 cephalopod-pleistomollusca split outlier may be an artifact of having a single cephalopod (*Sepia*  
257 *officinalis*) in the phylogeny, the tunicate-vertebrate split outlier is driven by the low diversity of  
258 vertebrates and the previously-documented exceptionally high diversity of tunicates (sea squirts;  
259 Nydam and Harrison 2010; Small et al. 2007). This deep node representing a rate shift in diversity  
260 could reflect a change in either effective population size or mutation rate, and there is some evidence  
261 of both in this genus *Ciona* (Small et al. 2007; Tsagkogeorga et al. 2012). Neither of these deep  
262 rate shifts in diversity is mirrored in the population size node-height test (Figure 4C, top right).  
263 Rather, it appears a trait impacting diversity but not census size (e.g. mutation rate or offspring  
264 distributions) has experienced a shift on the lineage separating tunicates and vertebrates. At nearly

265 600 Mya, these deep nodes illustrate a counterexample to Lynch’s claim that expected coalescent  
266 times do not share phylogenetic history because they are less than divergence times.

267 Finally, an important caveat is the increase in rate towards the tips could be caused by measure-  
268 ment noise. Inspecting the lineage pairs that lead to this increase in rate towards the tips indicates  
269 these represent plausible rate shifts, e.g. between cosmopolitan and endemic sister species like  
270 *Drosophila simulans* and *Drosophila sechellia*; however, ruling out measurement noise entirely as  
271 an explanation would involve considering the uncertainty of diversity and population size estimates.

## 272 **Assessing the Impact of Linked Selection on Diversity Across Taxa**

273 The above analyses reemphasize the drastic shortfall of diversity levels as compared to census  
274 sizes. Linked selection has been proposed as the mechanism that acts to reduce diversity levels  
275 from what we would expect given census sizes (Corbett-Detig et al. 2015; Gillespie 2000; Maynard  
276 Smith and Haigh 1974). Here, I test this hypothesis by estimating the scale of diversity reductions  
277 expected under background selection and recurrent hitchhiking, and compare these to the observed  
278 relationship between  $\pi$  and  $N_c$ .

279 I quantify the effect of linked selection on diversity as the ratio of observed diversity ( $\pi$ ) to  
280 the estimated diversity in the absence of linked selection ( $\pi_0$ ),  $R = \pi/\pi_0$ . There are two difficulties  
281 in evaluating whether linked selection could resolve Lewontin’s Paradox. The first difficulty is  
282 that  $\pi_0$  is unobserved. Previous work has estimated  $\pi_0$  using methods that exploit the spatial  
283 heterogeneity in recombination and functional density across the genome to fit linked selection  
284 models that incorporate both hitchhiking and background selection (Corbett-Detig et al. 2015;  
285 Elyashiv et al. 2016). The second difficulty is understanding how  $R$  varies across taxa, since we  
286 lack estimates of critical model parameters for most species. Still, I can address a key question: if  
287 diversity levels were determined by census sizes ( $\pi_0 = 4N_c\mu$ ), are the combined effects of background  
288 selection and recurrent hitchhiking sufficient to reduce diversity to observed levels? Furthermore,  
289 does the relationship between census size and predicted diversity under linked selection across  
290 species,  $\pi_{BGS+HH} = R\pi_0$ , match the observed relationship in Figure 2?

291 Since we lack estimates of key linked selection parameters across species, I generously param-  
292 eterize the hitchhiking and BGS models using estimates from *Drosophila melanogaster*, a species  
293 known to be strongly affected by linked selection (Sella et al. 2009). Under a generalized model of  
294 hitchhiking and background selection (Coop and Ralph 2012; Elyashiv et al. 2016) and assuming  
295  $N_e = N_c$ , expected diversity is

$$\pi_{BGS+HH} \approx \frac{\theta}{1/B(U,L) + 2N_c S(\gamma, L, J)} \quad (1)$$

296 where  $\theta = 4N_c\mu$ ,  $B(U, L)$  is the effect of background selection, and  $S(\gamma, L, J)$  is the rate of coa-  
297 lescence caused by sweeps (c.f. Elyashiv et al. 2016, equation 1, Coop and Ralph 2012 equation  
298 20). Under background selection models with recombination, the reduction is  $B(U, L) = \exp(-U/L)$   
299 where  $U$  is the per diploid genome per generation deleterious mutation rate, and  $L$  is the recom-  
300 bination map length (Hudson and Kaplan 1995; Hudson and Kaplan 1994; Nordborg et al. 1996).  
301 This BGS model is similar to models of effective population size under polygenic fitness variation,  
302 and can account for other modes of linked selection (Robertson 1961; Santiago and Caballero 1995,  
303 1998, see Appendix Section A2). The coalescent rate due to sweeps is  $S(\gamma, L, J) = \gamma/LJ$ , where  $\gamma$  is

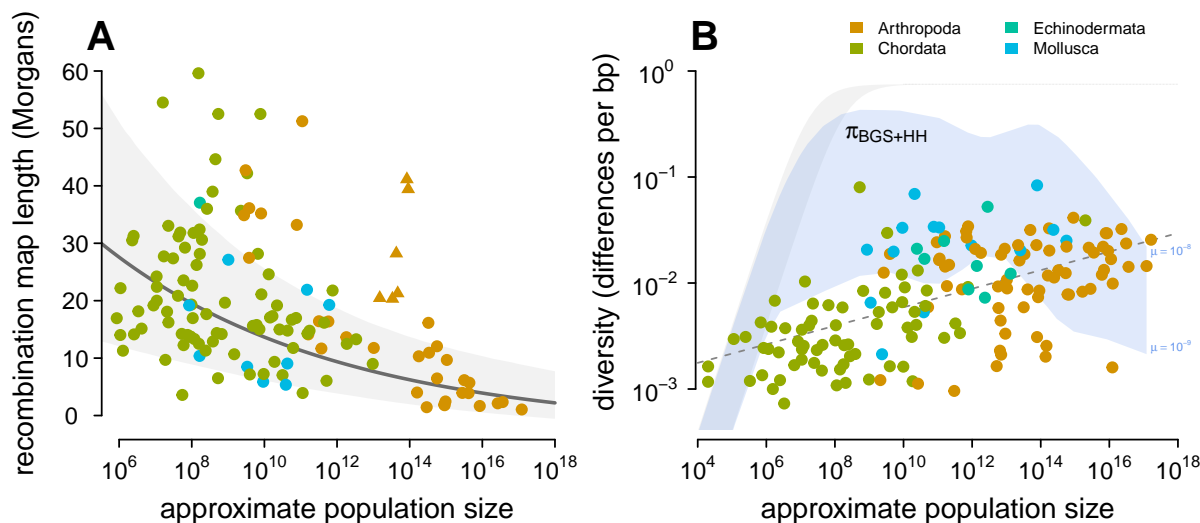

**Figure 5:** (A) The observed relationship between recombination map length ( $L$ ) and census size ( $N_c$ ) across 131 species with complete data and known phylogeny. Triangle points indicate social taxa excluded from the model fitting since these have adaptively higher recombination map lengths (Wilfert et al. 2007). The dark gray line is the estimated relationship under a phylogenetic mixed-effects model, and the gray interval is the 95% posterior average. (B) Points indicate the observed  $\pi$ - $N_c$  relationship across taxa shown in Figure 2, and the blue ribbon is the range of predicted diversity were  $N_e = N_c$  for  $\mu = 10^{-8}$ - $10^{-9}$ , and after accounting for the expected reduction in diversity due to background selection and recurrent hitchhiking under *Drosophila melanogaster* parameters. In both plots, point color indicates phylum.

304 the number of adaptive substitutions per generation, and  $J$  is the probability a lineage is trapped  
 305 by sweeps as they occur across the genome (c.f.  $J_{2,2}$  in equation 15 of Coop and Ralph 2012).

306 Parameterizing the model this way, I then set the key parameters that determine the impact  
 307 of recurrent hitchhiking and background selection ( $\gamma$ ,  $J$ , and  $U$ ) to high values estimated from  
 308 *Drosophila melanogaster* by Elyashiv et al. (2016). My estimate of  $\gamma_{Dmel}$  based Elyashiv et al.  
 309 implies  $\nu_{BP,Dmel} \approx 2.34 \times 10^{-11}$ , which is close to other estimates from *D. melanogaster* (see  
 310 Supplementary Figure S11A). The rate of deleterious mutations per diploid genome, per generation  
 311 is parameterized using the estimate from Elyashiv et al.,  $U_{Dmel} = 1.6$ , which is a bit greater  
 312 than previous estimates based on Bateman-Mukai approaches (Charlesworth 1987; Mukai 1988;  
 313 Mukai 1985). Finally, the probability that a lineage is trapped in a sweep,  $J_{Dmel}$ , is calculated  
 314 from the estimated genome-wide average coalescent rate due to sweeps from Elyashiv et al. (see  
 315 Supplementary Figure S11B and Methods: *Predicted Reductions in Diversity* for more details on  
 316 parameter estimates). Using these *Drosophila* parameters, I then explore how the predicted range  
 317 of diversity levels under background selection and recurrent hitchhiking varies across species with  
 318 recombination map length ( $L$ ) and census population size ( $N_c$ ).

319 Previous work has found that the impact of linked selection increases with  $N_c$  (Corbett-Detig et  
 320 al. 2015; see also Supplementary Figure S10A), and it is often thought that this is driven by higher  
 321 rates of adaptive substitutions in larger populations, despite equivocal evidence (Galtier 2016).  
 322 However, there is another mechanism by which species with larger population sizes might experience  
 323 a greater impact of linked selection: recombinational map length,  $L$ , is known to correlate with  
 324 body mass (Burt and Bell 1987) and thus varies inversely with population size. As this is a critical

parameter that determines the genome-wide impact of both hitchhiking and background selection, I examine the relationship between recombination map length ( $L$ ) and census population size ( $N_c$ ) across taxa, using available estimates of map lengths across species (Corbett-Detig et al. 2015; Stapley et al. 2017). I find a significant non-linear relationship using phylogenetic mixed-effects models (Figure 5A; see Methods: *Phylogenetic Comparative Methods*). There is also a correlation between map length and genome size (Supplementary Figure S5) and genome size and population size (Supplementary Figure S4). Overall, the negative relationship between map length and census size indicates linked selection is expected to be stronger in short map length, high- $N_c$  species.

Then, I predict the expected diversity ( $\pi_{BGS+HH}$ ) under background selection and hitchhiking, were  $N_e = N_c$ , and assuming all species had the rate of sweeps and strength of BGS as *D. melanogaster*. Since neutral mutation rates  $\mu$  are unknown and vary across species, I calculate the range of predicted  $\pi_{BGS+HH}$  estimates for  $\mu = 10^{-8}$ – $10^{-9}$  (using the four-alleles model, Tajima 1996), and compare this to the observed relationship between  $\pi$  and  $N_c$  in Figure 5B. Under these parameters, linked selection begins to appreciably depress diversity around  $N_c \approx 10^9$ , since  $S \approx 10^{-8}$ – $10^{-9}$  and linked selection dominates drift when  $S > 1/2N$ . Overall, this reveals two problems for the hypothesis that linked selection could solve Lewontin’s Paradox. First, low to mid- $N_c$  species (census sizes between  $10^6$ – $10^{14}$ ) have sufficiently long map lengths that their diversity levels are only moderately reduced by linked selection, leading to a wide gap between predicted and observed diversity levels. For this not to be the case, the parameters that determine the strength of background selection and recurrent hitchhiking would need to be *higher* among these species than in *Drosophila melanogaster*. This would require that the rate of adaptive mutations or the deleterious mutation rate be orders of magnitude higher for species within this range than in *Drosophila*, which is incompatible with the rate of adaptive substitutions across species (Galtier 2016) and mutation rates (Lynch 2010). Furthermore, linked selection has been quantified in humans, which fall in this census size range, and has been found to be relatively weak (Boyko et al. 2008; Cai et al. 2009; Hellmann et al. 2008; Hernandez et al. 2011; McVicker et al. 2009). Second, while hitchhiking and BGS can reduce predicted diversity levels for high- $N_c$  species ( $N_c > 10^{14}$ ) to observed levels, this would imply available estimates of  $\pi_0$  are underestimated by several orders of magnitude in *Drosophila* (Supplementary Figure S10B). Overall, while linked selection could decouple diversity from census size for high- $N_c$  species, recurrent hitchhiking and background selection seem unlikely to explain the observed patterns of diversity across species under our understanding of the range of parameter estimates.

## Discussion

Nearly fifty years after Lewontin’s description of the Paradox of Variation, how evolutionary, life history, and ecological processes interact to constrain diversity across taxa to a narrow range remains a mystery. Since Wright (1931; 1938), population geneticists have appreciated that various demographic processes shrink effective population sizes compared to census sizes, yet it has remained unclear whether these neutral processes alone can explain Lewontin’s Paradox and across-taxa diversity patterns. Alternatively, selective processes that act more strongly in larger populations could account for the observed narrow range of diversity. A critical first step to discerning the processes that act to transform census sizes to diversity levels across species is characterizing the observed  $\pi$ – $N_c$  relationship.

Here, for 172 taxa, I estimated the relationship between genomic estimates of pairwise diversity

368 and approximate census population size. Previous surveys have used allozyme-based estimates,  
369 fewer taxa, or qualitative measures of population size. My estimates of census population sizes  
370 are quite approximate, since they use body size to predict density. An improved estimate might  
371 consider vagility (as Soulé 1976 did), though this is harder to do systematically across many taxa.  
372 Future work might also use other ecological information, such as total biomass and estimated  
373 numbers of species within phyla, to improve census size estimates (Bar-On et al. 2018; Mora et al.  
374 2011). Still, it seems more accurate estimates would be unlikely to change the qualitative findings  
375 here, which resemble those of early surveys (Nei and Graur 1984; Soulé 1976).

376 One limitation of the dataset in this study is that diversity estimates are collated from a variety  
377 of sources rather than estimated with a single bioinformatic pipeline. This leads to technical noise  
378 across diversity estimates; perhaps the relationship between  $\pi$  and  $N_c$  found here could be tighter  
379 with a standardized bioinformatic pipeline. In addition to this technical variation, there might  
380 be systematic bioinformatic sources of bias in diversity estimates. For example high-diversity  
381 sequences may fail to align to the reference genome and end up unaccounted for, leading to a  
382 downward bias. Alternatively, high-diversity sequences might map to the reference genome, but  
383 adjacent mis-matching SNPs might be mistaken for a short insertion or deletion. While these issues  
384 might adversely affect the estimates in high-diversity species, it is unlikely they will qualitatively  
385 change the observed  $\pi$ - $N_c$  relationship.

## 386 **Macroevolution and Across-Taxa Population Genomics**

387 Lewontin’s Paradox arises from a comparison of diversity across species, yet surprisingly, previous  
388 work on this problem has not considered the impact of phylogenetic non-independence. I have  
389 addressed this limitation, showing that diversity does have a significant positive relationship with  
390 census size, after accounting for shared phylogenetic history among taxa. Additionally, I find a high  
391 degree of phylogenetic signal, and that arthropods and chordates form clusters, showing previous  
392 concern about phylogenetic non-independence was warranted (Gillespie 1991). Finally, this high  
393 degree of phylogenetic signal, as well as evidence of shifts in the rate of evolution of genetic diversity  
394 on deep timescales in molluscs and chordates, seem to contradict Lynch’s (2011) claim that since  
395 coalescent times are much less than divergence times, they are not affected by shared phylogenetic  
396 history.

397 One can reconcile my findings with Lynch’s claim by considering what evolutionary, ecological,  
398 life history, and demographic causal factors determine coalescent rates across species, and how these  
399 factors evolve across deep timescales. Lynch’s conjecture that coalescent times should be free of  
400 phylogenetic signal may be true *were we to condition* on these causal factors that could be affected  
401 by shared phylogenetic history. In contrast, my estimates of phylogenetic signal in diversity are  
402 not conditioned on these factors. Importantly, even “correcting for” phylogeny implicitly favors  
403 certain causal interpretations over others (Uyeda et al. 2018; Westoby et al. 1995). Future work  
404 could try to untangle what causal factors determine coalescent times across species, as well as how  
405 these factors evolve across macroevolutionary timescales.

406 Furthermore, beyond just accounting for phylogenetic non-independence, macroevolution and  
407 phylogenetic comparative methods are a promising way to approach across-species population ge-  
408 nomic questions. For example, one could imagine that diversification processes could contribute to  
409 Lewontin’s Paradox. If large- $N_c$  species were to have a rate of speciation that is greater than the  
410 rate at which mutation and drift reach equilibrium (which is indeed slower for large  $N_c$  species),  
411 this could act to decouple diversity from census population size. That is to say, even if the rate

412 of random demographic bottlenecks were constant across taxa, lineage-specific diversification pro-  
413 cesses could lead certain clades to be systematically further from demographic equilibrium, and  
414 thus have lower diversity than expected for their census population size.

## 415 Spatial and Demographic Processes

416 One limitation of this study is the inability to quantify the impact of spatial population genetic pro-  
417 cesses on the relationship between diversity and census population sizes across taxa. The genomic  
418 diversity estimates collated in this study unfortunately lack details about the sampling process and  
419 spatial data, which can have a profound impact on population genomic summary statistics (Battey  
420 et al. 2020). These issues could systematically bias species-wide diversity estimates; for example, if  
421 diversity estimates from a cosmopolitan species were primarily from a single subpopulation, diver-  
422 sity would be an underestimate relative to the entire population. However, biased spatial sampling  
423 alone seems incapable of explaining the  $\pi$ - $N_c$  divergence in high- $N_c$  taxa. In the extreme scenario  
424 in which only one subpopulation was sampled,  $F_{ST}$  would need to be close to one for population  
425 subdivision alone to sufficiently reduce the total population heterozygosity to explain the orders-  
426 of-magnitude shortfall between predicted and observed diversity levels. Yet, across-taxa surveys  
427 indicate that  $F_{ST}$  is almost never this high within species (Roux et al. 2016). Still, future work  
428 could quantify the extent to which spatial processes contribute to Lewontin’s Paradox. For ex-  
429 ample, high- $N_c$  taxa usually experience range expansions, likely with repeated founder effects and  
430 local extinction/recolonization dynamics that doubtlessly depress diversity. In particular, with the  
431 appropriate data, one could estimate the empirical relationship between dispersal distance, range  
432 size, and coalescent effective population size across taxa.

433 In this study, I have focused entirely on assessing the role of linked selection, rather than  
434 demography, in reducing diversity across taxa. In contrast to demographic models, models of  
435 linked selection have comparatively fewer parameters and more readily permit rough estimates  
436 of diversity reductions across taxa. Still, a full resolution of Lewontin’s Paradox would require  
437 understanding how the demographic processes across taxa with incredibly heterogeneous ecologies  
438 and life histories transform  $N_c$  into  $N_e$ . With population genomic data becoming available for more  
439 species, this could involve systematically inferring the demographic histories of tens of species and  
440 looking for correlations in the frequency and size of bottlenecks with  $N_c$  across species.

## 441 How could selection still explain Lewontin’s Paradox?

442 In this study, my goal was not to accurately estimate the levels in diversity across species, but  
443 rather to give linked selection the best possible chance to solve Lewontin’s Paradox. Still, I find  
444 that even after parameterizing hitchhiking and background selection with strong selection parameter  
445 estimates from *Drosophila melanogaster*, the predicted patterns of diversity under linked selection  
446 poorly fit observed patterns of diversity across species. While this suggests these two common  
447 modes of linked selection seem unlikely to explain across-taxa patterns of diversity, there are three  
448 major potential limitations of my approach that need further evaluation.

449 First, I approximate the reduction in diversity using homogeneous background selection and  
450 recurrent hitchhiking models (Coop and Ralph 2012; Hudson and Kaplan 1995; Kaplan et al.  
451 1989), when in reality, there is genome-wide heterogeneity in functional density, recombination  
452 rates, and the adaptive substitutions across species. Each of these factors mediate how strongly  
453 linked selection impacts diversity across the genome. Despite these model simplifications, my

454 predicted reduction in diversity in *Drosophila melanogaster* is 85%, which is reasonably close to the  
455 estimated 77% from the more realistic model of Elyashiv et al. that accounts for the actual position  
456 of substitutions, annotation features, and recombination rate heterogeneity (though it should be  
457 noted that these both use the same parameter estimates). Furthermore, even though my model  
458 fails to capture the heterogeneity of functionality density and recombination rate in real genomes,  
459 it is still extraordinary conservative, giving linked selection the best possible chance to decouple  
460 diversity from census size and explain Lewontin’s Paradox. This is in part because the strong  
461 selection parameter estimates from *Drosophila melanogaster* used, but also because I assume that  
462 the effective population size is the census size. Even then, this decoupling only occurs in very high-  
463 census-size species, and implies that the diversity in the absence of linked selection,  $\pi_0$ , is currently  
464 underestimated by several orders of magnitude. Moreover, the study of Corbett-Detig et al. (2015)  
465 did consider recombination rate and functional density heterogeneity in estimating the reduction  
466 due to linked selection across species, yet their predicted reductions are orders of magnitude weaker  
467 than those considered here by assuming that  $N_e = N_c$  (Supplementary Figure S10B). Overall, even  
468 with more realistic models of linked selection, current models of linked selection seem fundamentally  
469 unable to fit the diversity–census-size relationship.

470 Second, my model here only considers hard sweeps, and ignores the contribution of soft sweeps  
471 (e.g. from standing variation or recurrent mutations; Hermisson and Pennings 2005; Pennings  
472 and Hermisson 2006), partial sweeps (e.g those that do not reach fixation), and the interaction  
473 of sweeps and spatial processes. While future work exploring these alternative types of sweeps is  
474 needed, the predicted reductions in diversity found here under the simplified sweep model are likely  
475 relatively robust to these other modes of sweeps for a few reasons. First, the shape of the diversity–  
476 recombination curve is equivalent under models of partial sweeps and hard sweeps, though these  
477 imply different rates of sweeps (Coop and Ralph 2012). Second, in the limit where most fitness  
478 variation is due to weak soft sweeps from standing variation scattered across the genome (i.e. due to  
479 polygenic fitness variation), levels of diversity are well approximated by quantitative genetic linked  
480 selection models (QGLS Robertson 1961; Santiago and Caballero 1995, 1998). The reduction in  
481 diversity under these models is nearly identical to that under background selection models, in part  
482 because deleterious alleles at mutation-selection balance constitute a considerable component of  
483 fitness variation (see Appendix Section A2; Charlesworth 2015; Charlesworth and Hughes 2000).  
484 Finally, I also disregarded the interaction of sweeps and spatial processes. For populations spread  
485 over wide ranges, limited dispersal slows the spread of sweeps, allowing for new beneficial alleles  
486 to arise, spread, and compete against other segregating beneficial variants (Ralph and Coop 2010;  
487 Ralph and Coop 2015). Through limited dispersal should act to “soften sweeps” and not impact my  
488 findings for the reasons described above, future work could investigate how these processes impact  
489 diversity in ways not captured by hard sweep models.

490 Third, other selective processes, such as fluctuating selection or hard selective events, could  
491 reduce diversity in ways not captured by the background selection and hitchhiking model. Since  
492 frequency-independent fluctuating selection generally reduces diversity under most conditions (No-  
493 vak and Barton 2017), this could lead seasonality and other sources of temporal heterogeneity to  
494 reduce diversity in large- $N_c$  species with short generation times more than longer-lived species with  
495 smaller population sizes. Future work could consider the impact of fluctuating selection on diver-  
496 sity under simple models (Barton 2000) if estimates of key parameters governing the rate of such  
497 fluctuations were known across taxa. Additionally, another mode of selection that could severely  
498 reduce diversity across taxa, yet remains unaccounted for in this study, is periodic hard selective

499 events. These selective events could occur regularly in a species' history yet be indistinguishable  
500 from demographic bottlenecks from just population genomic data.

## 501 Measures of Effective Population Size, Timescales, and Lewontin's Paradox

502 Lewontin's Paradox shows the extent to which the effective population sizes implied by diversity,  $\tilde{N}_e$ ,  
503 diverge from census population sizes. However, there are a variety other effective population size  
504 estimates calculable from different data and summary statistics (Caballero 1994; Caballero 2020;  
505 Wang et al. 2016). These include estimators based on the observed decay in linkage disequilibrium  
506 or temporal estimators that use the variance in allele frequency change. These alternate estimators  
507 capture summaries of the effective population size on shorter timescales than coalescent-based  
508 estimators (Wang 2005), and thus could be used to tease out processes that impact the  $N_e$ - $N_c$   
509 relationship in the more recent past.

510 Temporal  $N_e$  estimators already play an important role in understanding another summary of  
511 the  $N_e$ - $N_c$  relationship: the ratio  $N_e/N_c$ , which is an important quantity in conservation genetics  
512 (Frankham 1995; Mace and Lande 1991) and in understanding evolution in highly-fecund marine  
513 species. Surveys of the  $N_e/N_c$  relationship across taxa indicate mean  $N_e/N_c$  is on order of  $\approx 0.1$   
514 (Frankham 1995; Palstra and Fraser 2012; Palstra and Ruzzante 2008), though the uncertainty in  
515 these estimates is high, and some species with sweepstakes reproduction systems like Pacific Oyster  
516 (*Crassostrea gigas*) can have  $N_e/N_c \approx 10^{-6}$ . Estimates of the  $N_e/N_c$  ratio are an important, and under  
517 appreciated piece of solving Lewontin's Paradox. For example, if  $N_e$  is estimated from the allele  
518 frequency change across a single generation (i.e. Waples 1989),  $N_e/N_c$  constrains the variance in  
519 reproductive success (Nunney 1993, 1996; Wright 1938). This implies that apart from species with  
520 sweepstakes reproductive systems, the variance in reproductive success each generation (whether  
521 heritable or non-heritable) is likely insufficient to significantly contribute to constraining  $\tilde{N}_e$  for  
522 most taxa. Still, further work is needed to characterize (1) how  $N_e/N_c$  varies with  $N_c$  across taxa  
523 (though see Palstra and Fraser 2012, Figure 2), and (2) the variance of  $N_e/N_c$  over longer time spans  
524 (i.e. how periodic sweepstakes reproductive events act to constrain  $N_e$ ). Overall, characterizing  
525 how  $N_e/N_c$  varies across taxa and correlates with ecology and life history traits could provide clues  
526 into the mechanisms that leads propagule size and survivorship curves to be predictive of diversity  
527 levels across taxa (Barry et al. 2020; Hallatschek 2018; Romiguier et al. 2014).

528 Finally, short-term temporal  $N_e$  estimators may play an important role in resolving Lewontin's  
529 Paradox. These estimators, along with short-term estimates of the impact of linked selection  
530 (Buffalo and Coop 2019, 2020), can inform us how much diversity is depressed across shorter  
531 timescales, free from the rare strong selective events or severe bottlenecks that impact pairwise  
532 diversity. It could be that in any one generation, selection contributes more to the variance of allele  
533 frequency changes than drift, yet across-taxa patterns in diversity are better explained processes  
534 acting sporadically on longer timescales, such as colonization, founder effects, and bottlenecks.  
535 Thus, the pairwise diversity may not give us the best picture of the generation to generation  
536 evolutionary processes acting in a population to change allele frequencies. Furthermore, certain  
537 observed adaptations are inexplicable given implied long-term coalescent effective population sizes,  
538 and are only possible if short-term effective population sizes are orders of magnitude larger (Barton  
539 2010; Karasov et al. 2010).



## 540 Conclusions

541 In *Building a Science of Population Biology* (2004), Lewontin laments the difficulty of uniting pop-  
542 ulation genetics and population ecology into a cohesive discipline of population biology. Lewontin's  
543 Paradox of Variation remains a critical unsolved problem at the nexus of these two different dis-  
544 ciplines: across species, we fail to understand the processes that connect a central parameter of  
545 population ecology, census size, to a central parameter of population genetics, effective population  
546 size. Given that selection seems to fall short in explaining Lewontin's Paradox, a full resolution will  
547 require a mechanistic understanding the ecological, life history, and macroevolutionary processes  
548 that connect  $N_c$  to  $N_e$  across taxa. While I have focused exclusively on metazoan taxa since their  
549 population densities are more readily approximated from body mass, a full resolution must also  
550 include plant species (with the added difficulties of variation in selfing rates, different dispersal  
551 strategies, pollination, etc.).

552 Looking at Lewontin's Paradox through an macroecological and macroevolutionary lens begets  
553 interesting questions outside of the realm of population genetics. Here, I have found that diversity  
554 and  $N_c$  have a surprisingly consistent relationship without many outliers, despite the wildly dis-  
555 parate ecologies, life histories, and evolutionary histories of the taxa included. Furthermore, taxa  
556 with very large census sizes have surprisingly low diversity. Is this explained by macroevolutionary  
557 processes, such as different rates of speciation for large- $N_c$  taxa? Or, are the levels of diversity  
558 we observe today an artifact of our timing relative to the last glacial maximum, or the last ma-  
559 jor extinction? Did large- $N_c$  prehistoric animal populations living in other geological eras have  
560 higher levels of diversity than our present taxa? Or, does ecological competition occur on shorter  
561 timescales such that strong population size contractions transpire and depress diversity, even if a  
562 species is undisturbed by climatic shifts or mass extinctions? Overall, patterns of diversity across  
563 taxa are determined by many overlaid evolutionary and ecological processes occurring on vastly dif-  
564 ferent timescales. Lewontin's Paradox of Variation may persist unresolved for some time because  
565 the solution requires synthesis and model building at the intersection of all these disciplines.

## 566 Methods

### 567 Diversity and Map Length Data

568 The data used in this study are collated from a variety of previously published surveys. Of the  
569 172 taxa with diversity estimates, 14 are from Corbett-Detig et al. (2015), 96 are from Leffler  
570 et al. (2012), and 62 are from Romiguier et al. (2014). The Corbett-Detig et al. data is estimated  
571 from four-fold degenerate sites, the Romiguier et al. data is synonymous sites, and the Leffler  
572 et al. data is estimated predominantly from silent, intronic, and non-coding sites. All types of  
573 diversity estimates from Leffler et al. (2012) were included to maximize the taxa in the study, since  
574 the variability of diversity across functional categories is much less than the diversity across taxa.  
575 Multiple diversity estimates per taxa were averaged. The total recombination map length data were  
576 from both Stapley et al. (2017; 30 taxa), and Corbett-Detig et al. (2015; 11 taxa). Both studies  
577 used sex-averaged recombination maps estimated with cross-based approaches; in some cases errors  
578 in the original data were found, documented, and corrected. These studies also included genome  
579 size estimates used to create Supplementary Figures S4 and S5.

## 580 Macroecological Estimates of Population Size

581 A rough approximation for total population size (census size) is  $N_c = DR$ , where  $D$  is the population  
582 density in individuals per  $\text{km}^2$  and  $R$  is the range size in  $\text{km}^2$ . Since population density estimates  
583 are not available for many taxa included in this study, I used the macroecological abundance-body  
584 size relationship to predict population density from body size. Since body length measurements  
585 are more readily available than body mass, I collated body length data from various sources (see  
586 [https://github.com/vsbuffalo/paradox\\_variation/](https://github.com/vsbuffalo/paradox_variation/)); body lengths were averaged across sexes  
587 for sexually dimorphic species, and if only a range of lengths was available, the midpoint was used.

588 Then, I re-estimated the relationship between body mass and population density using the data  
589 in the appendix table of Damuth (1987), which includes 696 taxa with body mass and population  
590 density measurements across mammals, fish, reptiles, amphibians, aquatic invertebrates, and ter-  
591 restrial arthropods. Though the abundance-body size relationship can be noisy at small spatial  
592 or phylogenetic scales (Chapter 5, Gaston and Blackburn 2008), across deeply diverged taxa such  
593 as those included in this study and Damuth (1987), the relationship is linear and homoscedastic  
594 (see Supplementary Figure S8). Using Stan (Stan Development Team 2020), I jointly estimated  
595 the relationship between body mass from body length using the Romiguier et al. (2014) taxa, and  
596 used this relationship to predict body mass for the taxa in this study. These body masses were  
597 then used to predict population density simultaneously, using the Damuth (1981) relationship. The  
598 code of this routine (`pred_popsizemissing_centered.stan`) is available in the GitHub repository  
599 ([https://github.com/vsbuffalo/paradox\\_variation/](https://github.com/vsbuffalo/paradox_variation/)).

600 To estimate range, I first downloaded occurrence records from Global Biodiversity Informa-  
601 tion Facility (*GBIF Occurrence Download* 2020) using the `rgbif` R package (Chamberlain and  
602 Boettiger 2017; Chamberlain et al. 2014). Using the occurrence locations, I inferred whether a  
603 species was marine or terrestrial, based on whether the majority of their recorded occurrences over-  
604 lapped a continent using `rnaturalearth` and the `sf` packages (Pebesma 2018; South 2017). For  
605 each taxon, I estimated its range by finding the minimum  $\alpha$ -shape containing these occurrences.  
606 The  $\alpha$  parameters were set more permissive for marine species since occurrence data for marine  
607 taxa were sparser. Then, I intersected the inferred ranges for terrestrial taxa with continental  
608 polygons, so their ranges did not overrun landmasses (and likewise with marine taxa and oceans).  
609 I inspected diagnostic plots for each taxa for quality control (all of these plots are available in  
610 `paradox_variation` GitHub repository), and in some cases, I manually adjusted the  $\alpha$  parameter  
611 or manually corrected the range based on known range maps (these changes are documented in  
612 the code `data/species_ranges.r` and `data/species_range_fixes.r`). The range of *C. elegans*  
613 was conservatively approximated as the area of the Western US and Western Europe based on  
614 the map in Frézal and Félix (2015). *Drosophila* species ranges are from the *Drosophila* Speciation  
615 Patterns website, (Yukilevich 2017; Yukilevich 2012). To further validate these range estimates,  
616 I have compared these to the qualitative range descriptions Leffler et al. (2012) (Supplementary  
617 Figure S7) and compared my  $\alpha$ -shape method to a subset of taxa with range estimates from IUCN  
618 Red List (Chamberlain 2020; IUCN 2020; Supplementary Figure S6). Each census population size  
619 is then estimated as the product of range and density.

## 620 Phylogenetic Comparative Methods

621 Of the full dataset of 172 taxa with diversity and population size estimates, a synthetic calibrated  
622 phylogeny was created for 166 species that appear in phylogenies in DateLife project (O'Meara

623 et al. 2020; Sanchez-Reyes and O’Meara 2019). This calibrated synthetic phylogeny was then  
624 subset for the analyses based on what species had non-missing trait data. The diversity-population  
625 size relationship assessed by a linear phylogenetic mixed-effects model implemented in Stan (Stan  
626 Development Team 2020), according to the methods described in (Villemereuil and Nakagawa 2014,  
627 see `stan/phylo_mm_regression.stan` in the GitHub repository). This same Stan model was used  
628 to estimate the same relationship between arthropod, chordate, and mollusc subsets of the data  
629 (Supplementary Figure S12).

630 The relationship between recombination map length and the logarithm of population size is  
631 non-linear and heteroscedastic, and was fit using a lognormal phylogenetic mixed-effects model.  
632 Since social insects have longer recombination map lengths (Wilfert et al. 2007), social taxa were  
633 excluded when fitting this model. All `Rhat` (Vehtari et al. 2019) values were below 1.01 and the  
634 effective number of samples was over 1,000, consistent with good mixing; details about the model are  
635 available in the GitHub repository (`phylo_mm_lognormal.stan`). Continuous trait maps (Figure  
636 4A and Supplementary Material Figure S14) were created using `phytools` (Revell 2012). Node-  
637 height tests were implemented based on the methods in `Geiger` (Harmon et al. 2008; Pennell et  
638 al. 2014), and use robust regression to fit a linear relationship between phylogenetic independent  
639 contrasts and branching times.

## 640 Predicted Reductions in Diversity

641 The predicted reductions in diversity due to linked selection are approximated using selection and  
642 deleterious mutation parameters from *Drosophila melanogaster*, and the recombination map length  
643 estimates from Stapley et al. (2017) and Corbett-Detig et al. (2015). The mathematical details of  
644 the simplified sweep model are explained in the Appendix Section A1. I use estimates of the number  
645 of substitutions,  $m$ , in genic regions between *D. melanogaster* and *D. simulans* from Hu et al. (2013).  
646 Following Elyashiv et al. (2016), only substitutions in UTRs and exons are included, since they  
647 found no evidence of sweeps in introns. Then, I average over annotation classes to estimate the  
648 mean proportion of substitutions that are beneficial,  $\alpha_{Dmel} = 0.42$ , which are consistent with the  
649 estimates of Elyashiv et al. and estimates from MacDonald–Kreitman test approaches (see Eyre-  
650 Walker 2006, Table 1). Then, I use divergence time estimates between *D. melanogaster* and *D.*  
651 *simulans* of  $4.2 \times 10^6$  and estimate of ten generations per year (Obbard et al. 2012), calculating  
652 there are  $\gamma_{Dmel} = \alpha m / 2T = 2.26 \times 10^{-3}$  substitutions per generation. Given the length of the  
653 *Drosophila* autosomes,  $G$ , this implies that the rate of beneficial substitutions per basepair, per  
654 generation is  $\nu_{BP,Dmel} = \gamma_{Dmel} / G = 2.34 \times 10^{-11}$ . Finally, I estimate  $J_{Dmel}$  from the estimate of  
655 genome-wide average rate of sweeps from Elyashiv et al. (Supplementary Table S6) and assuming  
656 *Drosophila*  $N_e = 10^6$ . These *Drosophila melanogaster* hitchhiking parameter estimates are close to  
657 other previously-published estimates (Supplementary Figure S11). Finally, I use  $U_{Dmel} = 1.6$ , from  
658 Elyashiv et al. (2016). With these parameter estimates from *D. melanogaster*, the recombination  
659 map lengths across species, and Equation (1), I estimate  $\pi_{BGS+HH}$  (assuming  $N_c = N_c$ ) across  
660 all species. This leads to a range of predicted diversity ranges across species corresponding to  
661  $\mu = 10^{-8}$ – $10^{-9}$ ; to visualize these, I take a convex hull of all diversity ranges and smooth this with  
662 R’s `smooth.spline` function.

## 663 Acknowledgments

664 I would like to thank Andy Kern and Peter Ralph for helpful discussions and supporting me during  
665 this work, and Graham Coop for inspiration and helpful feedback during socially distanced nature  
666 walks at Yolo Basin. I thank Jessica Stapley for kindly providing the recombination map length  
667 data, and Yaniv Brandvain, Amy Collins, Doc Edge, Tyler Kent, Chuck Langley, Sally Otto, Jeff  
668 Ross-Ibarra, Aaron Stern, Anastasia Teterina, Michael Turelli, and my Kern-Ralph labmates for  
669 helpful discussions. Sarah Friedman, Katherine Corn, and Josef Uyeda provided very useful advice  
670 about phylogenetic comparative methods; yet I take full responsibility for any shortcomings of my  
671 analysis. I would like to also thank UO librarian Dean Walton for helping me track down some  
672 rather difficult to find older papers. This work was supported by an NIH Grant (1R01GM117241)  
673 awarded to Andrew Kern.

## 674 Appendix

### 675 A1 Simplified Sweep Effects Model

676 I use a simplified model of the effects of recurrent hitchhiking and background selection (BGS)  
677 occurring uniformly along a genome. Expected diversity is given by

$$\mathbb{E}(\pi) = \frac{\theta}{\theta + 1/B + 2NS} \quad (\text{A2})$$

$$\approx \frac{\theta}{1/B + 2NS} \quad (\text{A3})$$

678 (cf. equation 1 Elyashiv et al. 2016, and equation 20 of Coop and Ralph 2012). The BGS component  
679 is given by Hudson and Kaplan (1995),

$$B(U, L) = N_e \exp\left(-\frac{U}{L}\right) \quad (\text{A4})$$

680 and the hitchhiking component is

$$S = \frac{\nu_{BP}}{r_{BP}} J \quad (\text{A5})$$

681 (cf. Coop and Ralph 2012 equation 20) where  $J$  is the probability that two lineages coalesce down  
682 to one, given sweeps occur uniformly along the genome. Under this homogeneous sweep model,  $J$   
683 is

$$J = \int_0^L q_f(r)^2 dr \quad (\text{A6})$$

684 where  $q_f(r)$  is the approximate probability that a lineage is trapped by a sweep to frequency  $f$   
685 when it is  $r$  recombination fraction away from this sweep (cf. Coop and Ralph 2012 equation 15).

686 Since I use *Drosophila melanogaster* parameter estimates from Elyashiv et al. (2016), I now  
 687 reconcile their model's  $S$  term with the simple model above. They estimate  $S$  in *Drosophila*  
 688 *melanogaster* using a composite likelihood model that considers hitchhiking and background selec-  
 689 tion simultaneously, using substitutions and stratifying by annotation. For a neutral position at  
 690 site  $x$ , the coalescent rate due to sweeps is given by Elyashiv et al.'s equation 3,

$$S(x) = \frac{1}{T} \sum_{i_S} \alpha(i_S) \sum_{y \in a(i_S)} \int \exp(-r(x, y)\tau(s, N))g(s|i_S)ds \quad (\text{A7})$$

691 where  $T$  is the number of generations that substitutions accrue,  $i_S = 1, \dots, I_S$  is the annotation  
 692 class (e.g. exons, introns, UTRs),  $\alpha(i_S)$  is the fraction of substitutions in annotation class  $i_S$  that  
 693 are beneficial,  $a(i_S)$  is the set of all substitutions in annotation class  $i_S$ ,  $\tau(s, N)$  is the fixation time  
 694 of a site with additive effect  $s$ , and  $g(s|i_S)$  is the distribution of selection coefficients for annotation  
 695 class  $i_S$ .

696 Note, that we can recover the model of Coop and Ralph (2012) from this expression. Suppose  
 697 there is only one annotation class, and  $\alpha$  fraction of substitutions are beneficial, and one selection  
 698 coefficient  $\bar{s}$ , (i.e.  $g(s) = \delta_0(s - \bar{s})$ ), then

$$S(x) = \frac{\alpha}{T} \sum_{y \in a} \exp(-r(x, y)\tau(\bar{s}, N)). \quad (\text{A8})$$

699 Let the number of substitutions be  $m := |a|$ , and imagine their positions are uniformly dis-  
 700 tributed on a segment of length  $G$  basepairs with the focal site is the middle at position  $x = 0$ .  
 701 Then, each substitution  $y$  is a random distance  $l_y \sim U(-G/2, G/2)$  away from the focal site. As-  
 702 suming the recombination rate is a constant  $r_{\text{BP}}$  per basepair, and approximating the sum with an  
 703 integral, we have,

$$S = \frac{\alpha}{T} \sum_{i=1}^m \mathbb{E}_{l_i} (\exp(-r_{\text{BP}}l_i\tau(\bar{s}, N))) \quad (\text{A9})$$

$$= \frac{\alpha}{TG} \sum_{i=1}^m \int_0^G \exp(-r_{\text{BP}}\ell\tau(\bar{s}, N))d\ell \quad (\text{A10})$$

$$= \frac{\alpha m}{TG} \int_0^G \exp(-r_{\text{BP}}\ell\tau(\bar{s}, N))d\ell \quad (\text{A11})$$

704 Using  $u$ -substitution with  $r = \ell r_{\text{BP}}$  this simplifies to

$$S = \frac{\alpha m}{TGr_{\text{BP}}} \int_0^L \exp(-r\tau(\bar{s}, N))dr \quad (\text{A12})$$

705 where  $L = Gr_{\text{BP}}$ .

706 To simplify this notation, note that the rate of adaptive substitutions per basepair per generation  
 707 is  $\nu_{\text{BP}} = \alpha m/GT$ , so

$$S = \frac{\nu_{\text{BP}}}{r_{\text{BP}}} \int_0^L \exp(-r\tau(\bar{s}, N)) dr \quad (\text{A13})$$

708 This is analogous to the second term of Coop and Ralph (2012) equation 17, with  $k = i = 2$   
 709 and  $x = 1$  (e.g. conditioning on a sweep to fixation). Note that there appears to be a factor of  
 710 two error in Elyashiv et al. (2016) compared to Coop and Ralph (2012); here I include the factor  
 711 of two. Then,

$$S = \frac{\nu_{\text{BP}}}{r_{\text{BP}}} \underbrace{\int_0^L \exp(-2r\tau(\bar{s}, N)) dr}_J \quad (\text{A14})$$

712 where the integral is equal to  $J$  (c.f.  $J_{2,2}$  of equation 15 in Coop and Ralph 2012) since a simple  
 713 model of  $q_f(r) = f \exp(-2r\tau(s, N))$  and if we condition on fixation,  $f = 1$ . This expression is useful  
 714 to generalize across species, since we know  $N$  and  $L$ . Additionally, we have estimates of  $\alpha$  and  
 715  $m/T$  in *Drosophila* and other species. In Elyashiv et al, they consider the number of substitutions  
 716 per generation in genic regions only; it should be noted that the number of coding basepairs varies  
 717 little across species. For convenience, I define  $\gamma = \alpha m/T$  as the number of adaptive substitutions  
 718 per generation per entire genome, such that  $S(\gamma, L, J) = \gamma/L J$  used in the main text. Using the  
 719 estimates of  $m \approx 4.5 \times 10^5$ ,  $\alpha \approx 0.42$ , and  $T \approx 8.4 \times 10^7$  from the Supplementary Material of  
 720 Elyashiv et al., I arrive at  $\gamma \approx 0.00226$  adaptive substitutions per generation, per genome. For  
 721 a  $\approx 100$  megabase genome, this translates to a  $\nu_{\text{BP}} \approx 2.34 \times 10^{-11}$ , which is close to previous  
 722 estimates (Supplementary Figure S11). For  $J$ , I use an empirical estimate calculated from the  
 723 genome-wide average of the rate of coalescent events due to sweeps, from Supplementary Table  
 724 S6 of Elyashiv et al. ( $r_s = 2NS \approx 0.92$ ). This implies  $J \approx 4.46 \times 10^{-4}$ . Alternatively, I have  
 725 tried using the estimated distribution of selection coefficients from Elyashiv et al., but this led to  
 726 a weaker estimate of  $J$ , since the adaptive substitutions considered tend to cluster around genic  
 727 regions. Note that these *Drosophila* sweep parameters I have used are close to previous estimates  
 728 (Supplementary Figures S11 A and B).

## 729 A2 Background Selection and Polygenic Fitness Models

730 Throughout the main text, I use recurrent hitchhiking and background selection models to estimate  
 731 the reduction in diversity due to linked selection. Another class of linked selection models, which  
 732 I refer to as quantitative genetic linked selection models (QGLS; Robertson 1961; Santiago and  
 733 Caballero 1995, 1998), can also depress genome-wide diversity. Furthermore, these models may  
 734 depress diversity at neutral sites unlinked to the regions containing fitness variation. While I did  
 735 not explicitly incorporate these models into my estimates of the diversity reductions, their effect  
 736 is implicit in background selection models because they are analytically nearly identical. Here, I  
 737 briefly sketch out the connection between BGS and QGLS models.

738 Under the Santiago and Caballero (1998) model, the effective population size is  $N_e^{\text{SC98}} =$   
 739  $N \exp(-C^2/(1-Z)L)$ , where  $C^2$  is the standardized heritable fitness variation,  $1 - Z$  is the decay  
 740 of genetic variance through time, and  $L$  is the recombination map length. This model can ac-  
 741 commodate a variety of modes of selection such as selection on an infinitesimal trait (Santiago and

742 Caballero 1995, p. 1016), and the flux of either weakly advantageous or deleterious alleles (Santiago  
743 and Caballero 1998, p. 2109). If the source of fitness variation is entirely the input of new deleteri-  
744 ous mutations with heterozygous effect  $sh$  at rate  $U$  per diploid genome per generation, then under  
745 mutation-selection balance, the equilibrium relative variance in reproductive success  $C^2 = Ush$   
746 (Crow and Kimura 1970; Caballero 2020, p. 167), and  $Z = 1 - sh - 1/2N_e$  (Santiago and Caballero  
747 1998). Thus, if  $1/2N_e \ll sh \ll 1$ , then  $C^2/(1-Z) \approx U$  and  $N_e^{SC98} \approx N \exp(-U/L)$ , which is the  
748 BGS model used in the main text and is a result of many background selection models with similar  
749 assumptions (Hudson and Kaplan 1994 eqn. 15; Hudson and Kaplan 1995 eqn. 9; Nordborg et al.  
750 1996 eqn. 4; Barton 1995 eqn. 22b). Intuitively, the similarity of these models reflects the fact that  
751 a substantial proportion of heritable fitness variation is caused by the continual flux of deleterious  
752 alleles across the genome under mutation-selection balance (Charlesworth 2015; Charlesworth and  
753 Hughes 2000).

## 754 References

- 755 Aguade, M, N Miyashita, and C H Langley (1989). “Reduced variation in the yellow-achaete-scute  
756 region in natural populations of *Drosophila melanogaster*”. *Genetics* 122.3, pp. 607–615.
- 757 Andolfatto, Peter (2007). “Hitchhiking effects of recurrent beneficial amino acid substitutions in  
758 the *Drosophila melanogaster* genome”. *Genome Res.* 17.12, pp. 1755–1762.
- 759 Bar-On, Yinon M, Rob Phillips, and Ron Milo (2018). “The biomass distribution on Earth”. *Proc.*  
760 *Natl. Acad. Sci. U. S. A.* 115.25, pp. 6506–6511.
- 761 Barry, Pierre, Thomas Broquet, and Pierre-Alexandre Gagnaire (2020). “Life tables shape genetic  
762 diversity in marine fishes”.
- 763 Barton, N H (1995). “Linkage and the limits to natural selection”. *Genetics* 140.2, pp. 821–841.
- 764 — (2000). “Genetic hitchhiking”. *Philos. Trans. R. Soc. Lond. B Biol. Sci.* 355.1403, pp. 1553–  
765 1562.
- 766 Barton, Nick (2010). “Understanding adaptation in large populations”. *PLoS Genet.* 6.6, e1000987.
- 767 Battey, C J, Peter L Ralph, and Andrew D Kern (2020). “Space is the Place: Effects of Continuous  
768 Spatial Structure on Analysis of Population Genetic Data”. *Genetics* 215.1, pp. 193–214.
- 769 Begun, D J and C F Aquadro (1992). “Levels of naturally occurring DNA polymorphism correlate  
770 with recombination rates in *D. melanogaster*”. *Nature* 356.6369, pp. 519–520.
- 771 Boyko, Adam R et al. (2008). “Assessing the evolutionary impact of amino acid mutations in the  
772 human genome”. *PLoS Genet.* 4.5, e1000083.
- 773 Buffalo, Vince and Graham Coop (2019). “The Linked Selection Signature of Rapid Adaptation in  
774 Temporal Genomic Data”. *Genetics* 213.3, pp. 1007–1045.
- 775 — (2020). “Estimating the genome-wide contribution of selection to temporal allele frequency  
776 change”. *Proceedings of the National Academy of Sciences* 117.34, pp. 20672–20680.
- 777 Burt, A and G Bell (1987). “Mammalian chiasma frequencies as a test of two theories of recombi-  
778 nation”. *Nature* 326.6115, pp. 803–805.
- 779 Caballero, A (1994). “Developments in the prediction of effective population size”. *Heredity* 73 ( Pt  
780 6), pp. 657–679.
- 781 Caballero, Armando (2020). *Quantitative Genetics*. Cambridge University Press.
- 782 Cai, James J, J Michael Macpherson, Guy Sella, and Dmitri A Petrov (2009). “Pervasive Hitchhiking  
783 at Coding and Regulatory Sites in Humans”. *PLoS Genet.* 5.1, e1000336–13.

- 784 Carpenter, Bob et al. (2017). “Stan: A Probabilistic Programming Language”. *Journal of Statistical*  
785 *Software, Articles* 76.1, pp. 1–32.
- 786 Chamberlain, Scott (2020). *rredlist: ‘IUCN’ Red List Client*.
- 787 Chamberlain, Scott and Carl Boettiger (2017). *R Python, and Ruby clients for GBIF species*  
788 *occurrence data*.
- 789 Chamberlain, Scott, K Ram, V Barve, and D Mcglinn (2014). “rgbif: interface to the global biodi-  
790 versity information facility API”. *R package version 0. 7 7*.
- 791 Charlesworth, B (1987). *The heritability of fitness*. Sexual selection: testing the alternatives.  
792 — (1996). “Background selection and patterns of genetic diversity in *Drosophila melanogaster*”.  
793 *Genet. Res.* 68.2, pp. 131–149.
- 794 Charlesworth, B, M T Morgan, and D Charlesworth (1993). “The effect of deleterious mutations  
795 on neutral molecular variation”. *Genetics* 134.4, pp. 1289–1303.
- 796 Charlesworth, Brian (2015). “Causes of natural variation in fitness: evidence from studies of *Drosophila*  
797 populations”. *Proc. Natl. Acad. Sci. U. S. A.* 112.6, pp. 1662–1669.
- 798 Charlesworth, Brian and Kimberly A Hughes (2000). “The Maintenance of Genetic Variation in  
799 Life-History Traits”. *Evolutionary Genetics: From Molecules to Morphology, Vol 1*. Ed. by R S  
800 Singh and C Krimbas. Vol. 1. Cambridge University Press, pp. 369–392.
- 801 Chen, Jun, Sylvain Glémin, and Martin Lascoux (2017). “Genetic Diversity and the Efficacy of  
802 Purifying Selection across Plant and Animal Species”. *Mol. Biol. Evol.* 34.6, pp. 1417–1428.
- 803 Coop, Graham (2016). *Does linked selection explain the narrow range of genetic diversity across*  
804 *species?* Tech. rep. Cold Spring Harbor Labs Journals.
- 805 Coop, Graham and Peter Ralph (2012). “Patterns of neutral diversity under general models of  
806 selective sweeps”. *Genetics* 192.1, pp. 205–224.
- 807 Corbett-Detig, Russell B, Daniel L Hartl, and Timothy B Sackton (2015). “Natural selection con-  
808 strains neutral diversity across a wide range of species”. *PLoS Biol.* 13.4, e1002112.
- 809 Crow, James Franklin and Motoo Kimura (1970). *An Introduction to Population Genetics Theory*.  
810 New York, Evanston and London: Harper & Row, Publishers.
- 811 Cutter, Asher D and Bret A Payseur (2003). “Selection at linked sites in the partial selfer *Caenorhab-*  
812 *ditis elegans*”. *Mol. Biol. Evol.* 20.5, pp. 665–673.
- 813 Damuth, John (1981). “Population density and body size in mammals”. *Nature* 290.5808, pp. 699–  
814 700.
- 815 — (1987). “Interspecific allometry of population density in mammals and other animals: the in-  
816 dependence of body mass and population energy-use”. *Biol. J. Linn. Soc. Lond.* 31.3, pp. 193–  
817 246.
- 818 Eldon, Bjarki and John Wakeley (2006). “Coalescent processes when the distribution of offspring  
819 number among individuals is highly skewed”. *Genetics* 172.4, pp. 2621–2633.
- 820 Elyashiv, Eyal et al. (2016). “A Genomic Map of the Effects of Linked Selection in *Drosophila*”.  
821 *PLoS Genet.* 12.8, e1006130.
- 822 Eyre-Walker, Adam (2006). “The genomic rate of adaptive evolution”. *Trends Ecol. Evol.* 21.10,  
823 pp. 569–575.
- 824 Felsenstein, Joseph (1985). “Phylogenies and the Comparative Method”. *Am. Nat.* 125.1, pp. 1–15.
- 825 Fisher, R A and E B Ford (1947). “The spread of a gene in natural conditions in a colony of the  
826 moth *Panaxia dominula*”. *Heredity* 1, pp. 143–174.
- 827 Frankham, Richard (1995). “Effective population size/adult population size ratios in wildlife: a  
828 review”. *Genet. Res.* 66.2, pp. 95–107.



- 829 Frankham, Richard (1996). “Relationship of Genetic Variation to Population Size in Wildlife”.  
830 *Conserv. Biol.* 10.6, pp. 1500–1508.
- 831 Freckleton, R P, P H Harvey, and M Pagel (2002). “Phylogenetic analysis and comparative data: a  
832 test and review of evidence”. *Am. Nat.* 160.6, pp. 712–726.
- 833 Freckleton, Robert P and Paul H Harvey (2006). “Detecting non-Brownian trait evolution in adap-  
834 tive radiations”. *PLoS Biol.* 4.11, e373.
- 835 Frézal, Lise and Marie-Anne Félix (2015). “C. elegans outside the Petri dish”. *Elife* 4.
- 836 Galtier, Nicolas (2016). “Adaptive Protein Evolution in Animals and the Effective Population Size  
837 Hypothesis”. *PLoS Genet.* 12.1, e1005774.
- 838 Gaston, Kevin and Tim Blackburn (2008). *Pattern and Process in Macroecology*. John Wiley &  
839 Sons.
- 840 *GBIF Occurrence Download* (2020).
- 841 Gillespie, J H (1991). *The causes of molecular evolution*. Oxford: Oxford University Press Google  
842 Scholar.
- 843 — (2000). “Genetic drift in an infinite population. The pseudohitchhiking model”. *Genetics* 155.2,  
844 pp. 909–919.
- 845 — (2001). “Is the population size of a species relevant to its evolution?” *Evolution* 55.11, pp. 2161–  
846 2169.
- 847 Hadfield, J D and S Nakagawa (2010). “General quantitative genetic methods for comparative biol-  
848 ogy: phylogenies, taxonomies and multi-trait models for continuous and categorical characters”.  
849 *J. Evol. Biol.* 23.3, pp. 494–508.
- 850 Hallatschek, Oskar (2018). “Selection-Like Biases Emerge in Population Models with Recurrent  
851 Jackpot Events”. *Genetics* 210.3, pp. 1053–1073.
- 852 Harmon, L J, J T Weir, C D Brock, R E Glor, and W Challenger (2008). *GEIGER: investigating  
853 evolutionary radiations*.
- 854 Hauser, Lorenz and Gary R Carvalho (2008). “Paradigm shifts in marine fisheries genetics: ugly  
855 hypotheses slain by beautiful facts”. *Fish Fish* 9.4, pp. 333–362.
- 856 Hedgecock, Dennis (1994). “Does variance in reproductive success limit effective population sizes  
857 of marine organisms”. *Genetics and evolution of aquatic organisms* 122, pp. 122–134.
- 858 Hedgecock, Dennis and Alexander I Pudovkin (2011). “Sweepstakes Reproductive Success in Highly  
859 Fecund Marine Fish and Shellfish: A Review and Commentary”. *Bull. Mar. Sci.* 87.4, pp. 971–  
860 1002.
- 861 Hellmann, Ines et al. (2008). “Population genetic analysis of shotgun assemblies of genomic se-  
862 quences from multiple individuals”. *Genome Res.* 18.7, pp. 1020–1029.
- 863 Hermisson, Joachim and Pleuni S Pennings (2005). “Soft sweeps: molecular population genetics of  
864 adaptation from standing genetic variation”. *Genetics* 169.4, pp. 2335–2352.
- 865 Hernandez, Ryan D et al. (2011). “Classic selective sweeps were rare in recent human evolution”.  
866 *Science* 331.6019, pp. 920–924.
- 867 Hu, Tina T, Michael B Eisen, Kevin R Thornton, and Peter Andolfatto (2013). “A second-  
868 generation assembly of the *Drosophila simulans* genome provides new insights into patterns  
869 of lineage-specific divergence”. *Genome Res.* 23.1, pp. 89–98.
- 870 Hudson, R R and N L Kaplan (1995). “Deleterious background selection with recombination”.  
871 *Genetics* 141.4, pp. 1605–1617.

- 872 Hudson, Richard R and Norman L Kaplan (1994). “Gene Trees with Background Selection”. *Non-*  
873 *Neutral Evolution: Theories and Molecular Data*. Ed. by Brian Golding. Boston, MA: Springer  
874 US, pp. 140–153.
- 875 IUCN (2020). *The IUCN Red List of Threatened Species*. <https://www.iucnredlist.org>. Ac-  
876 cessed: 2020-10-31.
- 877 Jensen, Jeffrey D, Kevin R Thornton, and Peter Andolfatto (2008). “An approximate bayesian  
878 estimator suggests strong, recurrent selective sweeps in *Drosophila*”. *PLoS Genet.* 4.9, e1000198.
- 879 Kaplan, N L, R R Hudson, and C H Langley (1989). “The “hitchhiking effect” revisited”. *Genetics*  
880 123.4, pp. 887–899.
- 881 Karasov, Talia, Philipp W Messer, and Dmitri A Petrov (2010). “Evidence that adaptation in  
882 *Drosophila* is not limited by mutation at single sites”. *PLoS Genet.* 6.6, e1000924.
- 883 Kimura, M and J F Crow (1964). “The number of alleles that can be maintained in a finite popu-  
884 lation”. *Genetics* 49, pp. 725–738.
- 885 Kimura, Motoo (1984). *The neutral theory of molecular evolution*. Cambridge University Press.
- 886 Kondrashov, Fyodor A and Alexey S Kondrashov (2010). “Measurements of spontaneous rates of  
887 mutations in the recent past and the near future”. *Philos. Trans. R. Soc. Lond. B Biol. Sci.*  
888 365.1544, pp. 1169–1176.
- 889 Leffler, Ellen M et al. (2012). “Revisiting an Old Riddle: What Determines Genetic Diversity Levels  
890 within Species?” *PLoS Biol.* 10.9, e1001388–9.
- 891 Lewontin, Richard C (1974). *The genetic basis of evolutionary change*. Vol. 560. Columbia University  
892 Press New York.
- 893 Lewontin, Richard C, Rama S Singh, and Marcy K Uyenoyama (2004). “Building a science of  
894 population biology”. *The Evolution of Population Biology*. Cambridge University Press, pp. 7–  
895 20.
- 896 Li, Haipeng and Wolfgang Stephan (2006). “Inferring the demographic history and rate of adaptive  
897 substitution in *Drosophila*”. *PLoS Genet.* 2.10, e166.
- 898 Lynch, Michael (1991). “Methods for the analysis of comparative data in evolutionary biology”.  
899 *Evolution* 45.5, pp. 1065–1080.
- 900 — (2010). “Evolution of the mutation rate”. *Trends Genet.* 26.8, pp. 345–352.
- 901 — (2011). “Statistical inference on the mechanisms of genome evolution”. *PLoS Genet.* 7.6, e1001389.
- 902 Mace, Georgina M and Russell Lande (1991). “Assessing Extinction Threats: Toward a Reevaluation  
903 of IUCN Threatened Species Categories”. *Conserv. Biol.* 5.2, pp. 148–157.
- 904 Macpherson, J Michael, Guy Sella, Jerel C Davis, and Dmitri A Petrov (2007). “Genomewide  
905 spatial correspondence between nonsynonymous divergence and neutral polymorphism reveals  
906 extensive adaptation in *Drosophila*”. *Genetics* 177.4, pp. 2083–2099.
- 907 Malécot, Gustave (1948). *Mathématiques de l’hérédité*. Paris: Masson.
- 908 Maruyama, T and M Kimura (1980). “Genetic variability and effective population size when local  
909 extinction and recolonization of subpopulations are frequent”. *Proc. Natl. Acad. Sci. U. S. A.*  
910 77.11, pp. 6710–6714.
- 911 Maynard Smith, John and John Haigh (1974). “The hitch-hiking effect of a favourable gene”. *Genet.*  
912 *Res.* 23.1, pp. 23–35.
- 913 McVicker, Graham, David Gordon, Colleen Davis, and Phil Green (2009). “Widespread genomic  
914 signatures of natural selection in hominid evolution”. *PLoS Genet.* 5.5, e1000471.
- 915 Mora, Camilo, Derek P Tittensor, Sina Adl, Alastair G B Simpson, and Boris Worm (2011). “How  
916 many species are there on Earth and in the ocean?” *PLoS Biol.* 9.8, e1001127.

- 917 Mukai, T (1988). *Genotype-environment interaction in relation to the maintenance of genetic vari-*  
918 *ability in populations of Drosophila melanogaster*. Proceedings of the Second International Con-  
919 ference On Quantitative Genetics.
- 920 Mukai, Terumi (1985). “Experimental Verification of the Neutral Theory”. *Population Genetics and*  
921 *Molecular Evolution*. Ed. by Tomoko Ohta and Kenichi Aoki. Berlin: Springer-Verlag, pp. 125–  
922 145.
- 923 Nei, Masatoshi and Dan Graur (1984). “Extent of protein polymorphism and the neutral mutation  
924 theory”. *Evol. Biol.* 17, pp. 73–118.
- 925 Nevo, E (1978). “Genetic variation in natural populations: patterns and theory”. *Theor. Popul.*  
926 *Biol.* 13.1, pp. 121–177.
- 927 Nevo, Eviatar, Avigdor Beiles, and Rachel Ben-Shlomo (1984). “The Evolutionary Significance of  
928 Genetic Diversity: Ecological, Demographic and Life History Correlates”. *Evolutionary Dynam-*  
929 *ics of Genetic Diversity*. Springer Berlin Heidelberg, pp. 13–213.
- 930 Nicolaisen, Lauren E and Michael M Desai (2012). “Distortions in genealogies due to purifying  
931 selection”. *Mol. Biol. Evol.* 29.11, pp. 3589–3600.
- 932 Nordborg, Magnus, Brian Charlesworth, and Deborah Charlesworth (1996). “The effect of recom-  
933 bination on background selection\*”. *Genet. Res.* 67.02, pp. 159–174.
- 934 Novak, Sebastian and Nicholas H Barton (2017). “When Does Frequency-Independent Selection  
935 Maintain Genetic Variation?” *Genetics* 207.2, pp. 653–668.
- 936 Nunney, Leonard (1993). “The influence of mating system and overlapping generations on effective  
937 population size”. *Evolution* 47.5, pp. 1329–1341.
- 938 — (1996). “The influence of variation in female fecundity on effective population size”. *Biol. J.*  
939 *Linn. Soc. Lond.* 59.4, pp. 411–425.
- 940 Nydam, Marie L and Richard G Harrison (2010). “Polymorphism and divergence within the ascidian  
941 genus *Ciona*”. *Mol. Phylogenet. Evol.* 56.2, pp. 718–726.
- 942 O’Meara, Brian et al. (2020). *datelife: Go from a List of Taxa or a Tree to a Chronogram using*  
943 *Open Scientific Data*.
- 944 Obbard, Darren J et al. (2012). “Estimating divergence dates and substitution rates in the *Drosophila*  
945 phylogeny”. *Mol. Biol. Evol.* 29.11, pp. 3459–3473.
- 946 Ohta, T and M Kimura (1973). “A model of mutation appropriate to estimate the number of  
947 electrophoretically detectable alleles in a finite population”. *Genet. Res.* 22.2, pp. 201–204.
- 948 Palkopoulou, Eleftheria et al. (2015). “Complete genomes reveal signatures of demographic and  
949 genetic declines in the woolly mammoth”. *Curr. Biol.* 25.10, pp. 1395–1400.
- 950 Palstra, Friso P and Dylan J Fraser (2012). “Effective/census population size ratio estimation: a  
951 compendium and appraisal”. *Ecol. Evol.* 2.9, pp. 2357–2365.
- 952 Palstra, Friso P and Daniel E Ruzzante (2008). “Genetic estimates of contemporary effective popula-  
953 tion size: what can they tell us about the importance of genetic stochasticity for wild population  
954 persistence?” *Mol. Ecol.* 17.15, pp. 3428–3447.
- 955 Pebesma, Edzer J (2018). “Simple features for R: Standardized support for spatial vector data”. *R*  
956 *J.* 10.1, p. 439.
- 957 Pennell, M W et al. (2014). *geiger v2.0: an expanded suite of methods for fitting macroevolutionary*  
958 *models to phylogenetic trees*.
- 959 Pennings, Pleuni S and Joachim Hermisson (2006). “Soft sweeps II—molecular population genetics  
960 of adaptation from recurrent mutation or migration”. *Mol. Biol. Evol.* 23.5, pp. 1076–1084.

- 961 Powell, Jeffrey R (1975). “Protein variation in natural populations of animals”. *Evolutionary Bi-*  
962 *ology: Volume 8*. Ed. by Dobzhansky, Theodosius, and Hecht, Max K. and Steere, William C.  
963 New York: Plenum Press, pp. 79–199.
- 964 Ralph, Peter and Graham Coop (2010). “Parallel Adaptation: One or Many Waves of Advance of  
965 an Advantageous Allele?” *Genetics* 186.2, pp. 647–668.
- 966 Ralph, Peter L and Graham Coop (2015). “The Role of Standing Variation in Geographic Conver-  
967 gent Adaptation\*”. *Am. Nat.* 186.S1, S5–S23.
- 968 Revell, Liam J (2012). “phytools: an R package for phylogenetic comparative biology (and other  
969 things)”. *Methods Ecol. Evol.* 3.2, pp. 217–223.
- 970 Robertson, Alan (1961). “Inbreeding in artificial selection programmes”. *Genet. Res.* 2.2, pp. 189–  
971 194.
- 972 Romiguier, J et al. (2014). “Comparative population genomics in animals uncovers the determinants  
973 of genetic diversity”. *Nature* 515.7526, pp. 261–263.
- 974 Roux, Camille et al. (2016). “Shedding Light on the Grey Zone of Speciation along a Continuum  
975 of Genomic Divergence”. *PLoS Biol.* 14.12, e2000234.
- 976 Sanchez-Reyes, Luna L and Brian O’Meara (2019). *datelife: Leveraging databases and analytical*  
977 *tools to reveal the dated Tree of Life*.
- 978 Santiago, E and A Caballero (1995). “Effective size of populations under selection”. *Genetics* 139.2,  
979 pp. 1013–1030.
- 980 — (1998). “Effective size and polymorphism of linked neutral loci in populations under directional  
981 selection”. *Genetics* 149.4, pp. 2105–2117.
- 982 Sella, Guy, Dmitri A Petrov, Molly Przeworski, and Peter Andolfatto (2009). “Pervasive natural  
983 selection in the Drosophila genome?” *PLoS Genet.* 5.6, e1000495.
- 984 Shapiro, Joshua A et al. (2007). “Adaptive genic evolution in the Drosophila genomes”. *Proceedings*  
985 *of the National Academy of Sciences* 104.7, pp. 2271–2276.
- 986 Slatkin, M (1977). “Gene flow and genetic drift in a species subject to frequent local extinctions”.  
987 *Theor. Popul. Biol.* 12.3, pp. 253–262.
- 988 Small, Kerrin S, Michael Brudno, Matthew M Hill, and Arend Sidow (2007). “Extreme genomic  
989 variation in a natural population”. *Proc. Natl. Acad. Sci. U. S. A.* 104.13, pp. 5698–5703.
- 990 Soulé, M E (1976). “Allozyme variation, its determinants in space and time”. *Molecular evolution*.  
991 Ed. by F J Ayala. Sunderland, Massachusetts: Sinauer Associates, pp. 60–77.
- 992 South, Andy (2017). *rnaturalearth: World Map Data from Natural Earth*.
- 993 Spielman, Derek, Barry W Brook, and Richard Frankham (2004). “Most species are not driven to  
994 extinction before genetic factors impact them”. *Proc. Natl. Acad. Sci. U. S. A.* 101.42, pp. 15261–  
995 15264.
- 996 Stan Development Team (2020). *Stan Modeling Language Users Guide and Reference Manual*.
- 997 Stapley, Jessica, Philine G D Feulner, Susan E Johnston, Anna W Santure, and Carole M Smadja  
998 (2017). “Variation in recombination frequency and distribution across eukaryotes: patterns and  
999 processes”. *Philos. Trans. R. Soc. Lond. B Biol. Sci.* 372.1736.
- 1000 Stephan, W (1995). “An improved method for estimating the rate of fixation of favorable mutations  
1001 based on DNA polymorphism data”. *Mol. Biol. Evol.* 12.5, pp. 959–962.
- 1002 Stephan, W and C H Langley (1998). “DNA polymorphism in lycopersicon and crossing-over per  
1003 physical length”. *Genetics* 150.4, pp. 1585–1593.

- 1004 Stephan, Wolfgang, Thomas H E Wiehe, and Marcus W Lenz (1992). “The effect of strongly  
1005 selected substitutions on neutral polymorphism: Analytical results based on diffusion theory”.  
1006 *Theor. Popul. Biol.* 41.2, pp. 237–254.
- 1007 Tajima, F (1996). “The amount of DNA polymorphism maintained in a finite population when the  
1008 neutral mutation rate varies among sites”. *Genetics* 143.3, pp. 1457–1465.
- 1009 Tsagkogeorga, Georgia, Vincent Cahais, and Nicolas Galtier (2012). “The population genomics of  
1010 a fast evolver: high levels of diversity, functional constraint, and molecular adaptation in the  
1011 tunicate *Ciona intestinalis*”. *Genome Biol. Evol.* 4.8, pp. 740–749.
- 1012 Uyeda, Josef C, Rosana Zenil-Ferguson, and Matthew W Pennell (2018). “Rethinking phylogenetic  
1013 comparative methods”. *Syst. Biol.* 67.6, pp. 1091–1109.
- 1014 Vehtari, Aki, Andrew Gelman, Daniel Simpson, Bob Carpenter, and Paul-Christian Bürkner (2019).  
1015 “Rank-normalization, folding, and localization: An improved  $\hat{R}$  for assessing convergence of  
1016 MCMC”. arXiv: 1903.08008 [stat.CO].
- 1017 Villemereuil, Pierre de and Shinichi Nakagawa (2014). “General Quantitative Genetic Methods for  
1018 Comparative Biology”. *Modern Phylogenetic Comparative Methods and Their Application in  
1019 Evolutionary Biology: Concepts and Practice*. Ed. by László Zsolt Garamszegi. Berlin, Heidel-  
1020 berg: Springer Berlin Heidelberg, pp. 287–303.
- 1021 Wang, J (2005). “Estimation of effective population sizes from data on genetic markers”. *Proceedings  
1022 of the Royal Society of London B: Biological Sciences* 360.1459, pp. 1395–1409.
- 1023 Wang, J, E Santiago, and A Caballero (2016). “Prediction and estimation of effective population  
1024 size”. *Heredity* 117.4, pp. 193–206.
- 1025 Waples, R S (1989). “A generalized approach for estimating effective population size from temporal  
1026 changes in allele frequency”. *Genetics* 121.2, pp. 379–391.
- 1027 Waples, Robin S, Peter M Grewe, Mark W Bravington, Richard Hillary, and Pierre Feutry (2018).  
1028 “Robust estimates of a high  $N_e/N$  ratio in a top marine predator, southern bluefin tuna”. *Sci  
1029 Adv* 4.7, eaar7759.
- 1030 Waples, Robin S, Gordon Luikart, James R Faulkner, and David A Tallmon (2013). “Simple life-  
1031 history traits explain key effective population size ratios across diverse taxa”. *Proc. Biol. Sci.*  
1032 280.1768, p. 20131339.
- 1033 Westoby, Mark, Michelle R Leishman, and Janice M Lord (1995). “On misinterpreting the ‘phylo-  
1034 genetic correction’”. *Journal of Ecology* 83, pp. 531–534.
- 1035 Whitney, Kenneth D and Theodore Garland (2010). “Did Genetic Drift Drive Increases in Genome  
1036 Complexity?” *PLoS Genet.* 6.8, e1001080–6.
- 1037 Wilfert, L, J Gadau, and P Schmid-Hempel (2007). “Variation in genomic recombination rates  
1038 among animal taxa and the case of social insects”. *Heredity* 98.4, pp. 189–197.
- 1039 Wright, S (1948). “On the roles of directed and random changes in gene frequency in the genetics  
1040 of populations”. *Evolution* 2.4, pp. 279–294.
- 1041 Wright, Sewall (1931). “Evolution in Mendelian populations”. *Genetics* 16.2, p. 97.
- 1042 — (1938). “Size of population and breeding structure in relation to evolution”. *Science* 87.2263,  
1043 pp. 430–431.
- 1044 Yukilevich, R (2017). *Drosophila Speciation Patterns*. [www.Drosophila-speciation-patterns.com](http://www.Drosophila-speciation-patterns.com). Accessed: 2020-5-27.
- 1045  
1046 Yukilevich, Roman (2012). “Asymmetrical patterns of speciation uniquely support reinforcement  
1047 in *Drosophila*”. *Evolution* 66.5, pp. 1430–1446.

1048 Zhao, Shancen et al. (2013). “Whole-genome sequencing of giant pandas provides insights into  
1049 demographic history and local adaptation”. *Nat. Genet.* 45.1, pp. 67–71.

## 1050 Supplementary Table and Figures

### 1051 S1 Diversity and IUCN Red List Status

|               | mean  | 2.5 % | 97.5 % |
|---------------|-------|-------|--------|
| $\beta_0$     | -2.80 | -3.10 | -2.50  |
| $\beta_{LC}$  | -0.37 | -0.55 | -0.19  |
| $\beta_{NT}$  | -0.20 | -0.80 | 0.41   |
| $\beta_{VU}$  | -0.31 | -0.81 | 0.18   |
| $\beta_{EN}$  | -0.38 | -0.71 | -0.05  |
| $\beta_{CR}$  | -0.01 | -0.63 | 0.60   |
| $\beta_{N_c}$ | 0.07  | 0.05  | 0.10   |

**Table S1:** The regression estimates of full IUCN Red List population size model for diversity,  $\log_{10}(\pi) = \beta_0 + \beta_{LC}LC + \beta_{NT}NT + \beta_{VU}VU + \beta_{EN}EN + \beta_{CR}CR + \beta_{N_c} \log_{10}(N_c)$ ;  $df = 165$ . Using AIC to compare this full model to a reduced model of  $\log_{10}(\pi) = \beta_0 + \beta_{N_c} \log_{10}(N_c)$ ,  $AIC_{full} = 203.18$ ,  $AIC_{reduced} = 212.41$ .

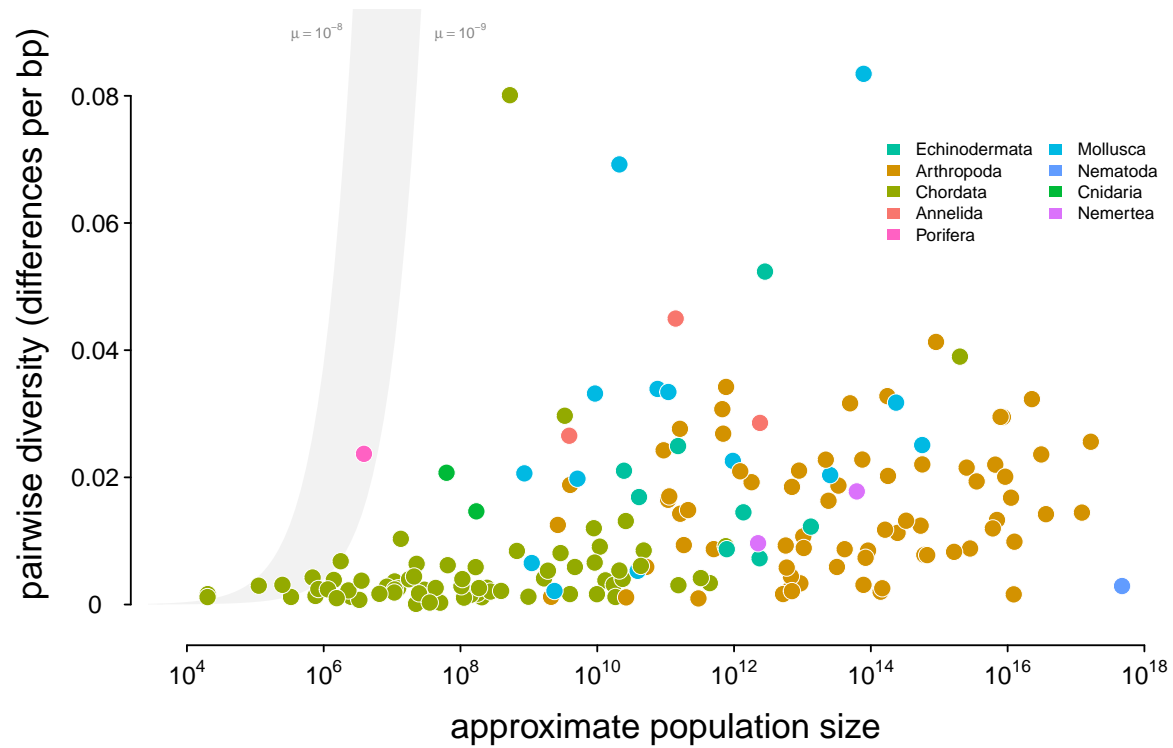

**Figure S1:** A version of Figure 2 with diversity on a linear, rather than log, scale. Points are colored by phylum, and the shaded region is the predicted neutral level of diversity assuming  $N_e = N_c$  with mutation range ranging between  $10^{-10} \leq \mu \leq 10^{-8}$ .

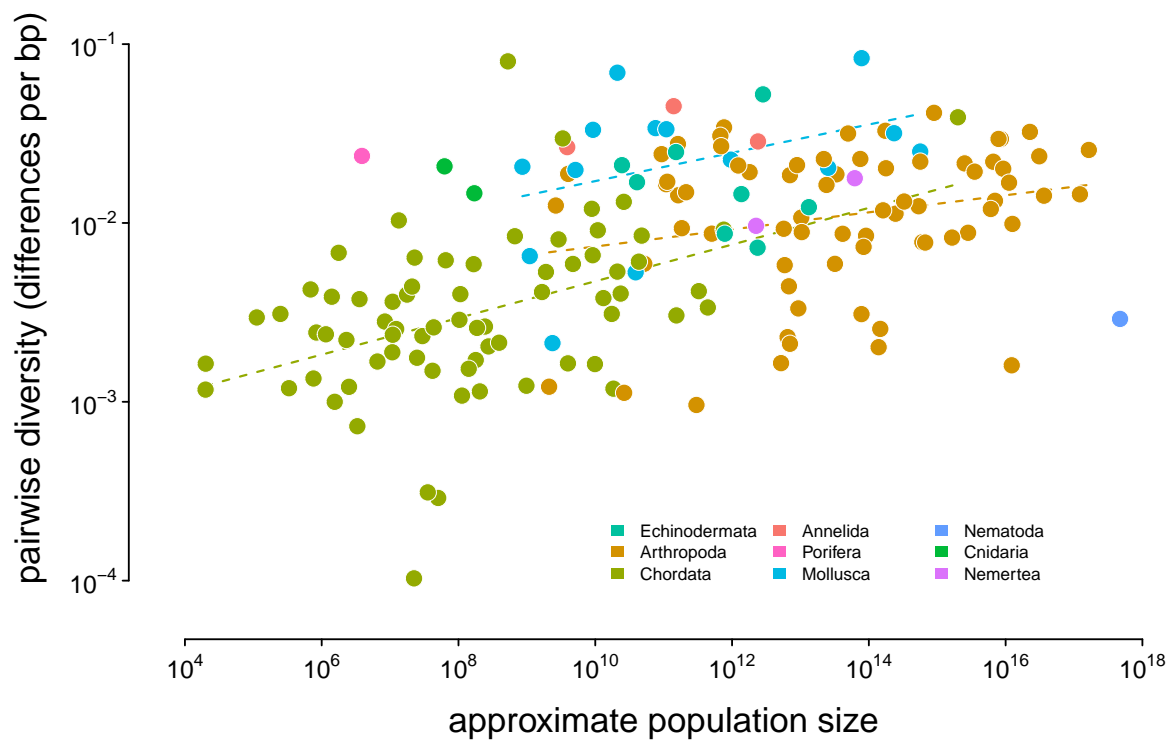

**Figure S2:** Diversity and approximate population size for 172 taxa, colored by phylum; the dashed lines indicate the non-phylogenetic OLS estimates of the relationship between population size and diversity grouped by phyla.



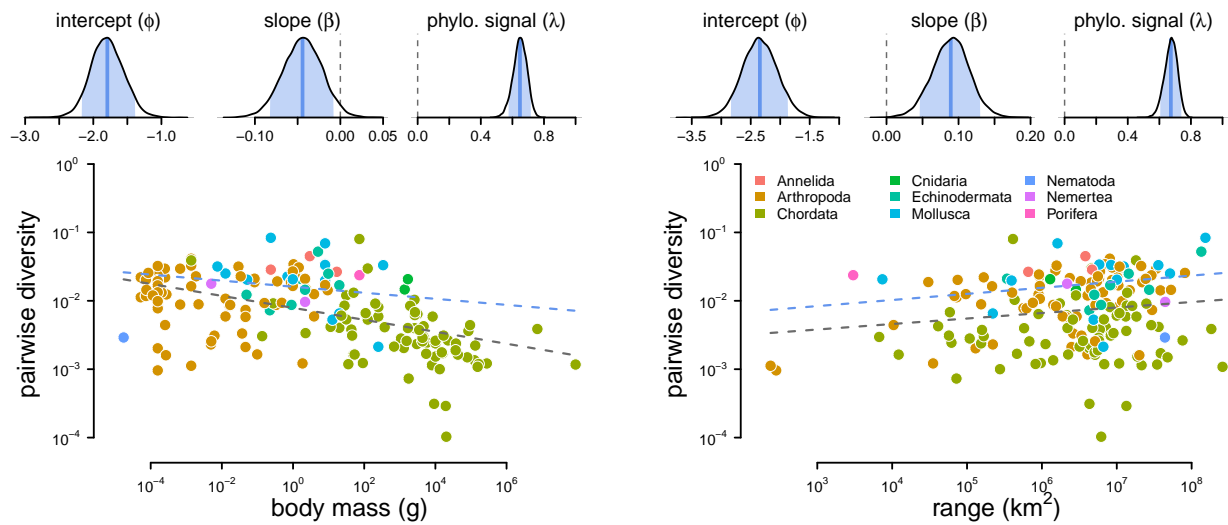

**Figure S3:** The relationship between diversity (differences per basepair) and body mass (left) and range (right) across 172 species. The top row are posterior distributions of parameters estimated using the phylogenetic mixed-effects model using 166 taxa in the synthetic phylogeny for the intercept, slope, and phylogenetic signal from the mixed-effects model. The bottom row contain each species as a point, colored by phyla. The gray dashed line is the non-phylogenetic standard regression estimate, and the blue dashed line is the relationship fit by the phylogenetic mixed-effects model.

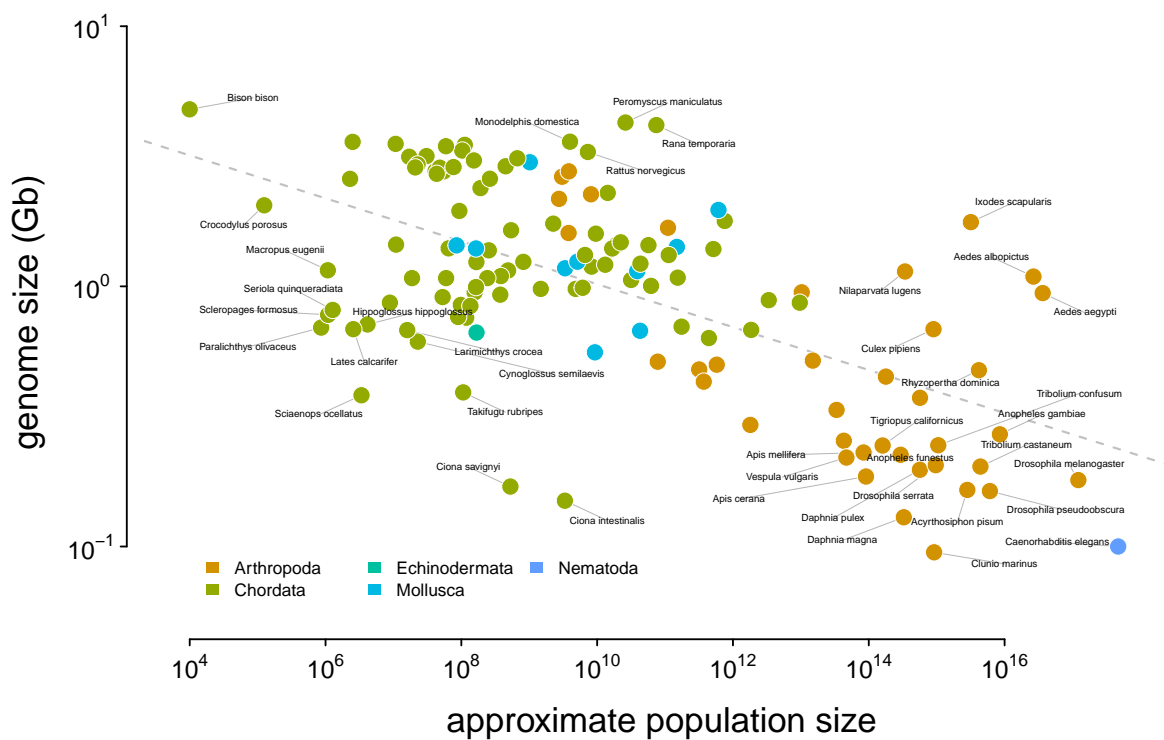

**Figure S4:** The relationship between genome size and approximate census population size. The dashed gray line indicates the OLS fit. Tiger salamander (*Ambystoma tigrinum*) was excluded because of its exceptionally large genome size (30Gbp).

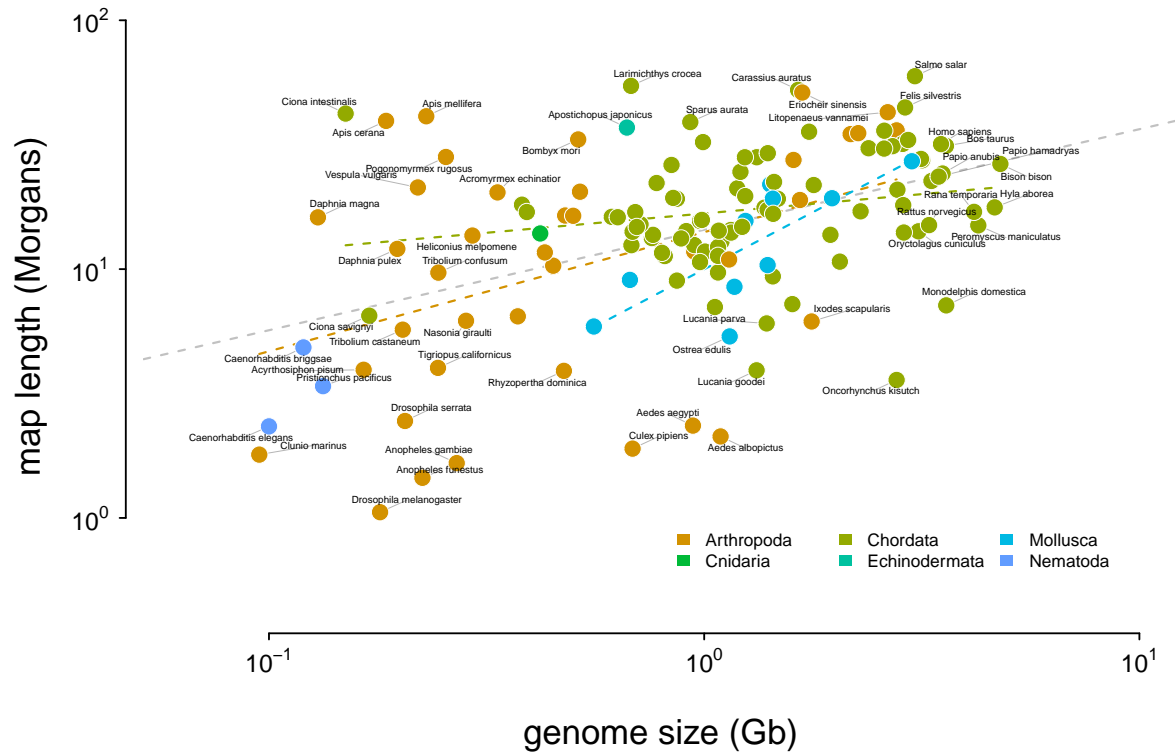

**Figure S5:** The relationship between genome size and recombination map length. The dashed gray line indicates the OLS fit for all taxa, and the dashed colored dashed lines indicate the linear relationship fit by phyla. Tiger salamander (*Ambystoma tigrinum*) was excluded because of its exceptionally large genome size (30Gbp).

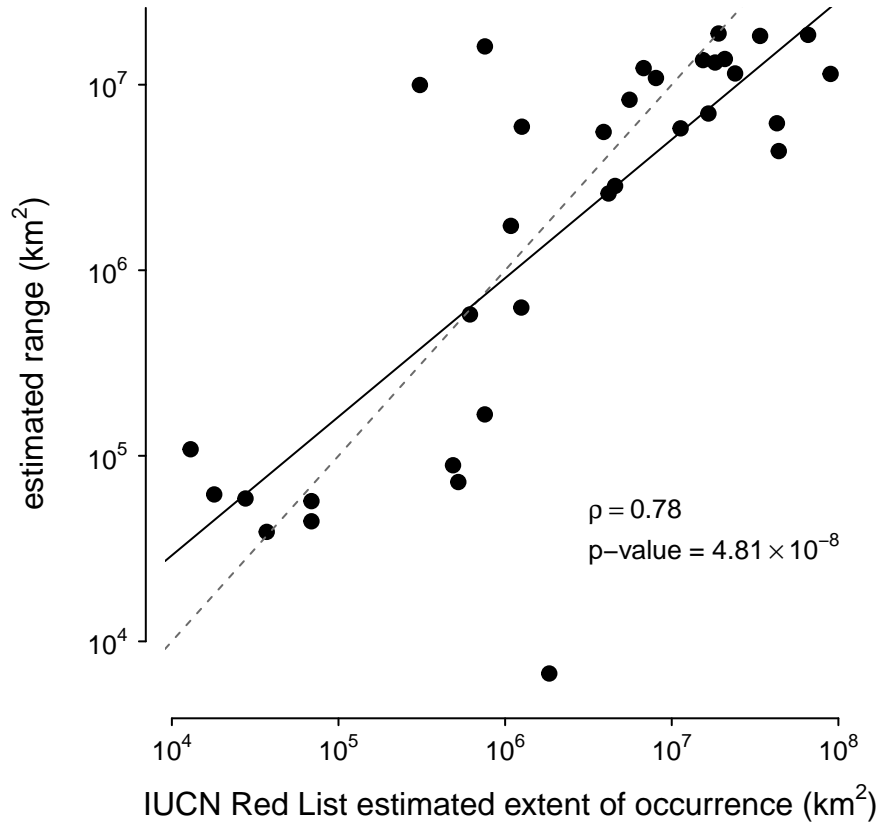

**Figure S6:** The correspondence between the ranges estimated with the alpha hull method applied to GBIF data used in this paper and IUCN Red List's Extent of Occurrence for the subset of species in both datasets. Note that the IUCN Red List contains predominantly endangered species, which leads to ascertainment bias; still, the high correlation between the estimated ranges shows the alpha hull method works well.

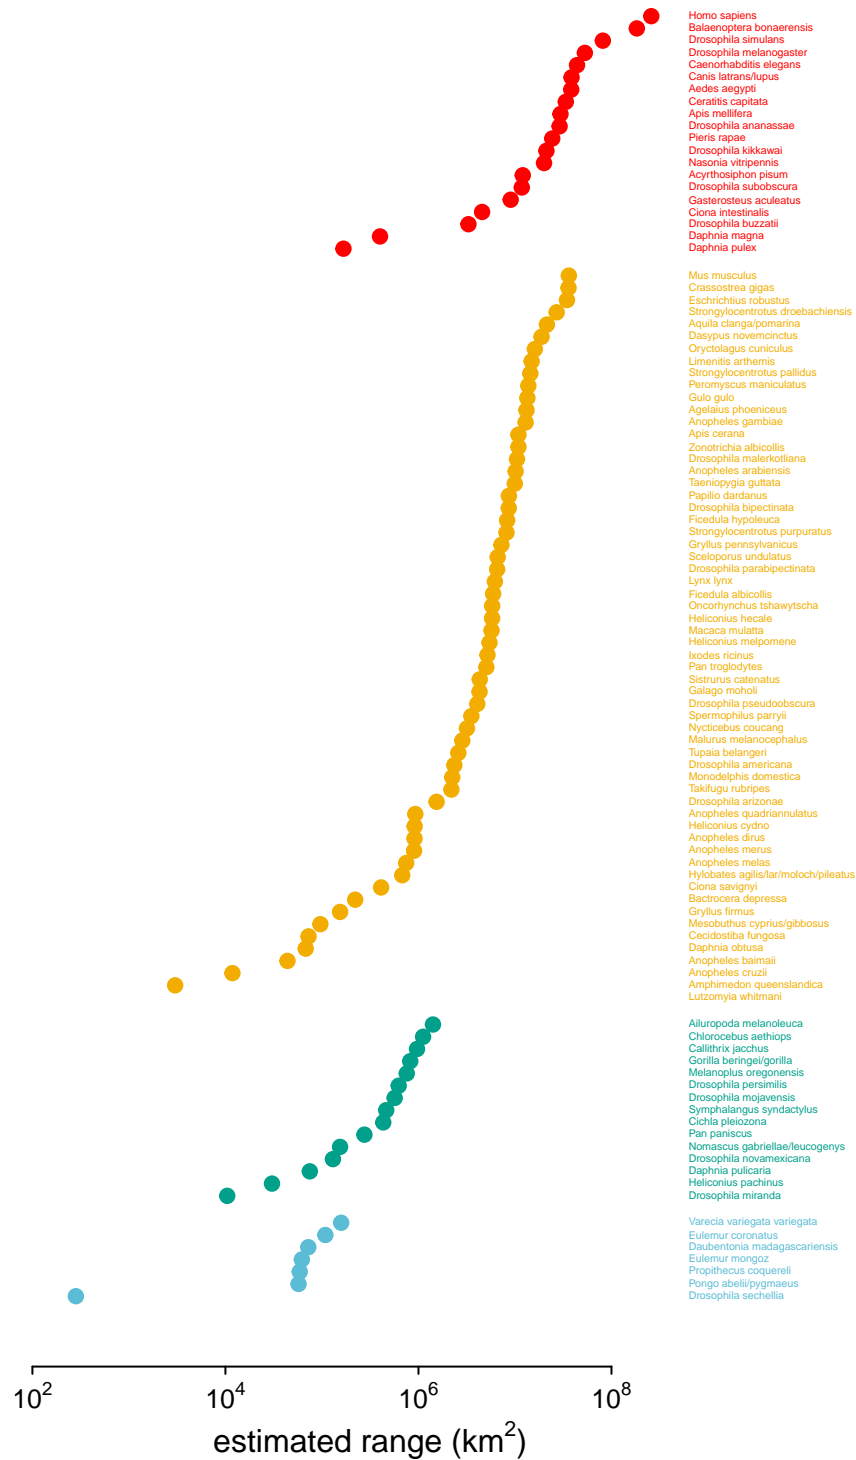

**Figure S7:** The estimated ranges using GBIF occurrence data, ordered within and colored by the original range category labels assigned in Leffler et al. (2012).

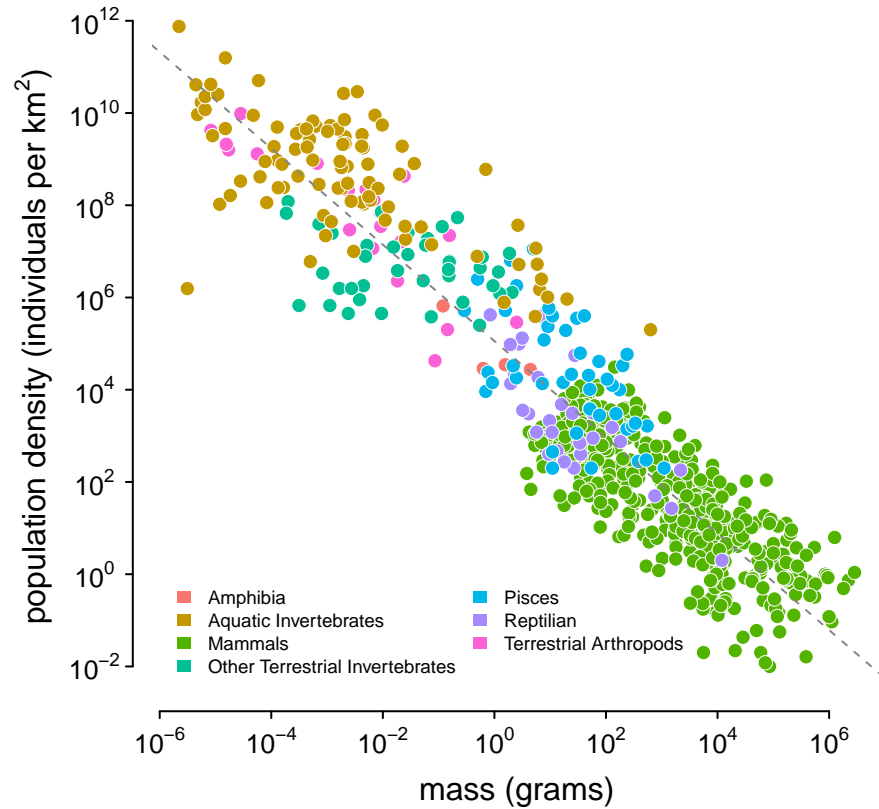

**Figure S8:** The appendix table of Damuth (1987); the color indicates Damuth's original group labels. The dashed line was estimated using a lognormal regression model in Stan. References to each measurement are available in Damuth (1987).

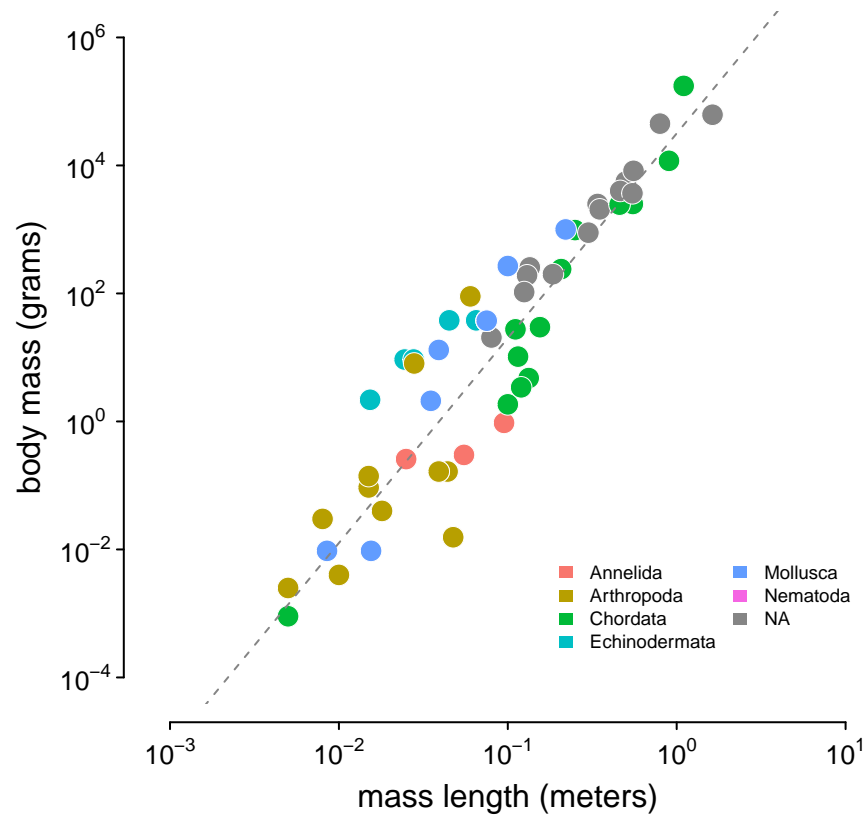

**Figure S9:** The relationship between body length (meters) and body mass (grams) in the Romiguier et al. (2014) data set, used to infer body masses for taxa. The gray dashed line is the line of best fit inferred using Stan.

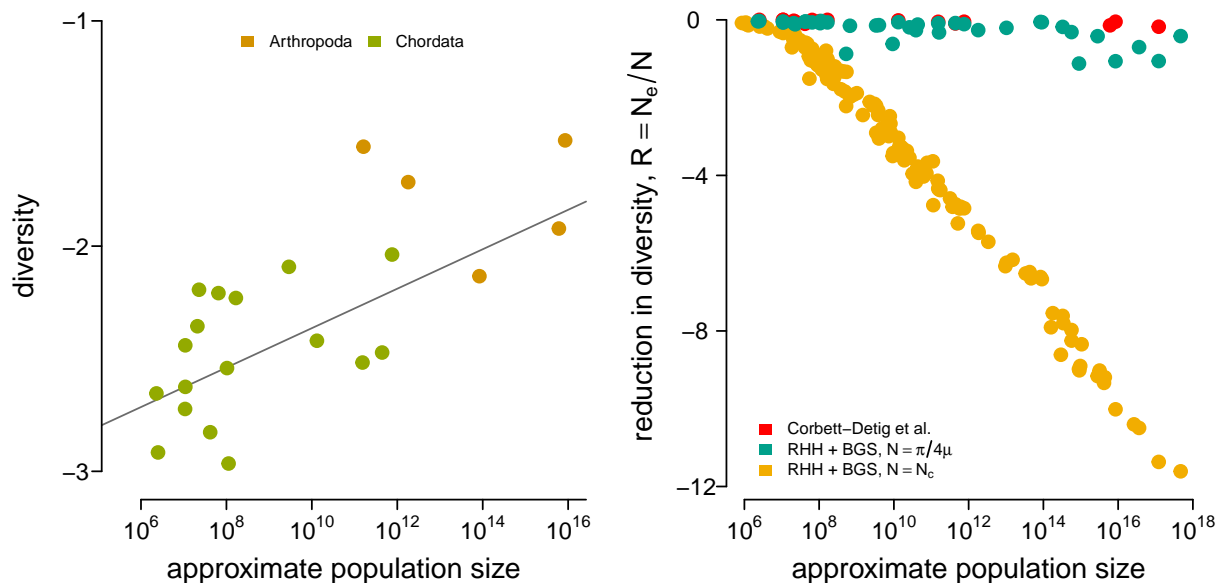

**Figure S10:** (A) The diversity data from Corbett-Detig et al. (2015) and the census population size estimated here for metazoan taxa. The blue point is selfing *C. elegans* and was excluded from the OLS fit. (B) The reductions in diversity,  $R = N_e/N$ , plotted against census size across species. The red points are the reductions estimated by Corbett-Detig et al. (2015). This confirms Corbett-Detig et al.'s (2015) finding that the impact of selection ( $I = 1 - R$ ) increases with census population size (though, in the original paper size body size and range were used as separate proxy variables for census population size). The green and red points are the predicted reduction in diversity under the recurrent hitchhiking (RHH) and background selection (BGS) model using the *Drosophila melanogaster* parameters as described in the main text. The reduction in the diversity due to sweeps, from Equation (1), is determined by the term  $2NS$ . Green points treat  $N$  as the implied effective population size from diversity  $\tilde{N}_e = \hat{\pi}/4\mu$ , assuming  $\mu = 10^{-9}$ . Yellow points treat  $N$  as the census size,  $N = N_c$ . Overall, using the census size, e.g.  $2N_cS$ , leads to reductions in diversity that far exceed the empirical estimates of Corbett-Detig et al. and reasonable model-based predictions from  $\tilde{N}_e$ .



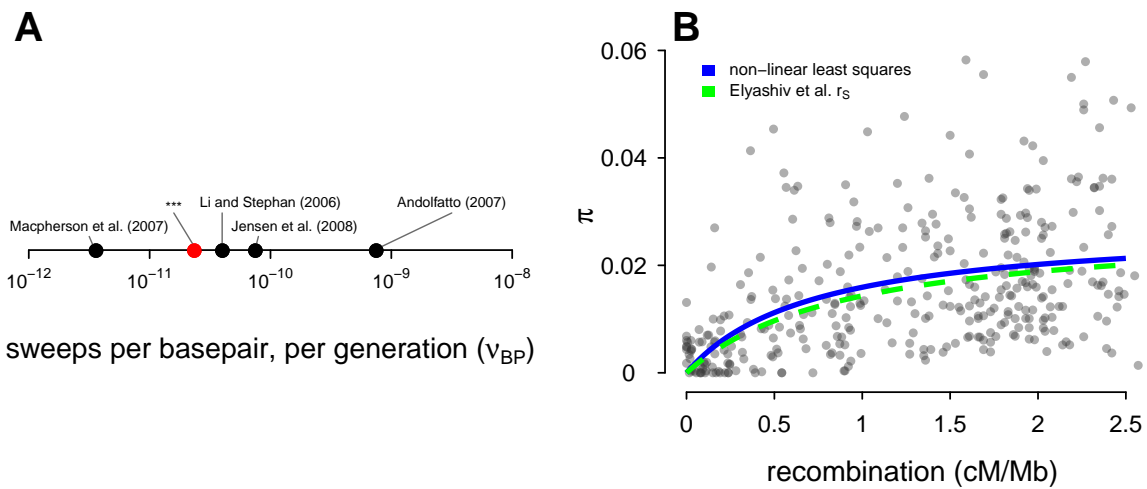

**Figure S11:** (A) The estimate of the number of sweeps per basepair, per genome ( $\nu_{BP}$ ) from Table 2 of Elyashiv et al. (2016) (the studies included are Andolfatto 2007; Li and Stephan 2006; Macpherson et al. 2007 and Jensen et al. 2008). (B) Points are the data from Shapiro et al. (2007). The blue line is the non-linear least squares fit to the data, and the green dashed line is the sweep model parameterized by the genome-wide average sweep coalescent rate  $2NS \approx 0.92$  from the classic sweep and background selection model of Elyashiv et al. (2016) ( $r_s$  in Supplementary Table S6).

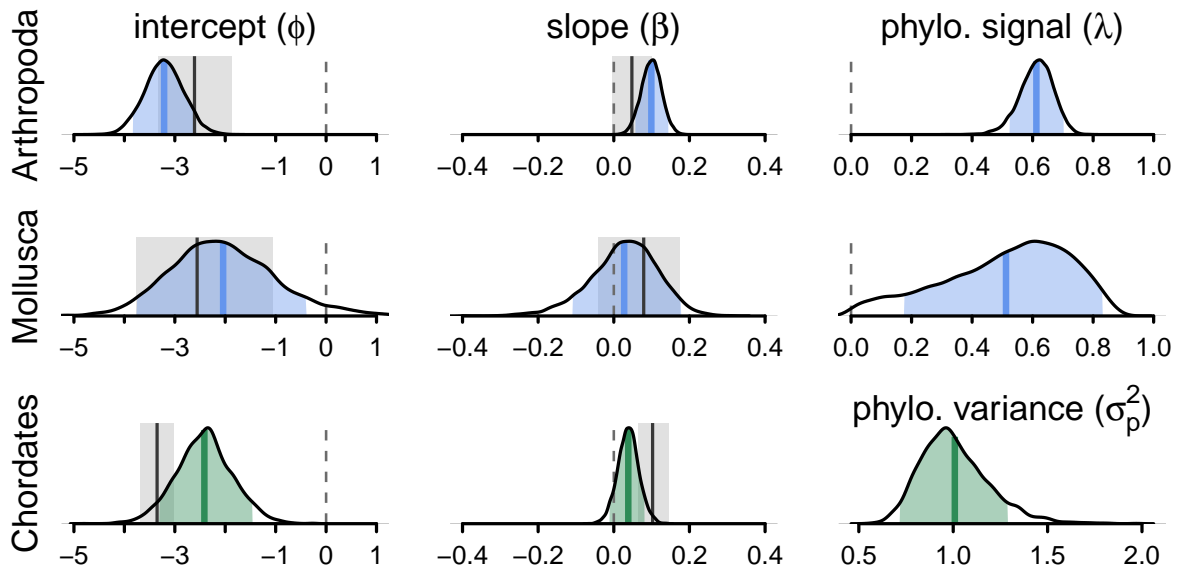

**Figure S12:** The posterior distributions for the parameters of the phylogenetic mixed-effects model of diversity and population size (this is analogous to Figure 4B) fit separately on chordates ( $n = 68$ ), molluscs ( $n = 13$ ), and arthropods ( $n = 68$ ). The phylogenetic mixed-effects model for chordates indicated the best-fitting model had no residual variance ( $\sigma_r^2 = 0$ ), so an alternate model without this variance component was used to ensure proper convergence; this model is shown in green. The light blue (green) shaded regions are the 90% credible intervals, the blue (green) lines the posterior averages, the gray shaded regions the OLS bootstrap 95% confidence intervals, and the gray lines the OLS estimate. Note that unlike Figure 4, the OLS estimate uses all taxa, not just those present in the phylogeny, since splitting the data by phyla reduces sample sizes (OLS with just the subset of taxa in the phylogeny is not significant for either chordates and arthropods). The vertical dashed gray line indicates zero.



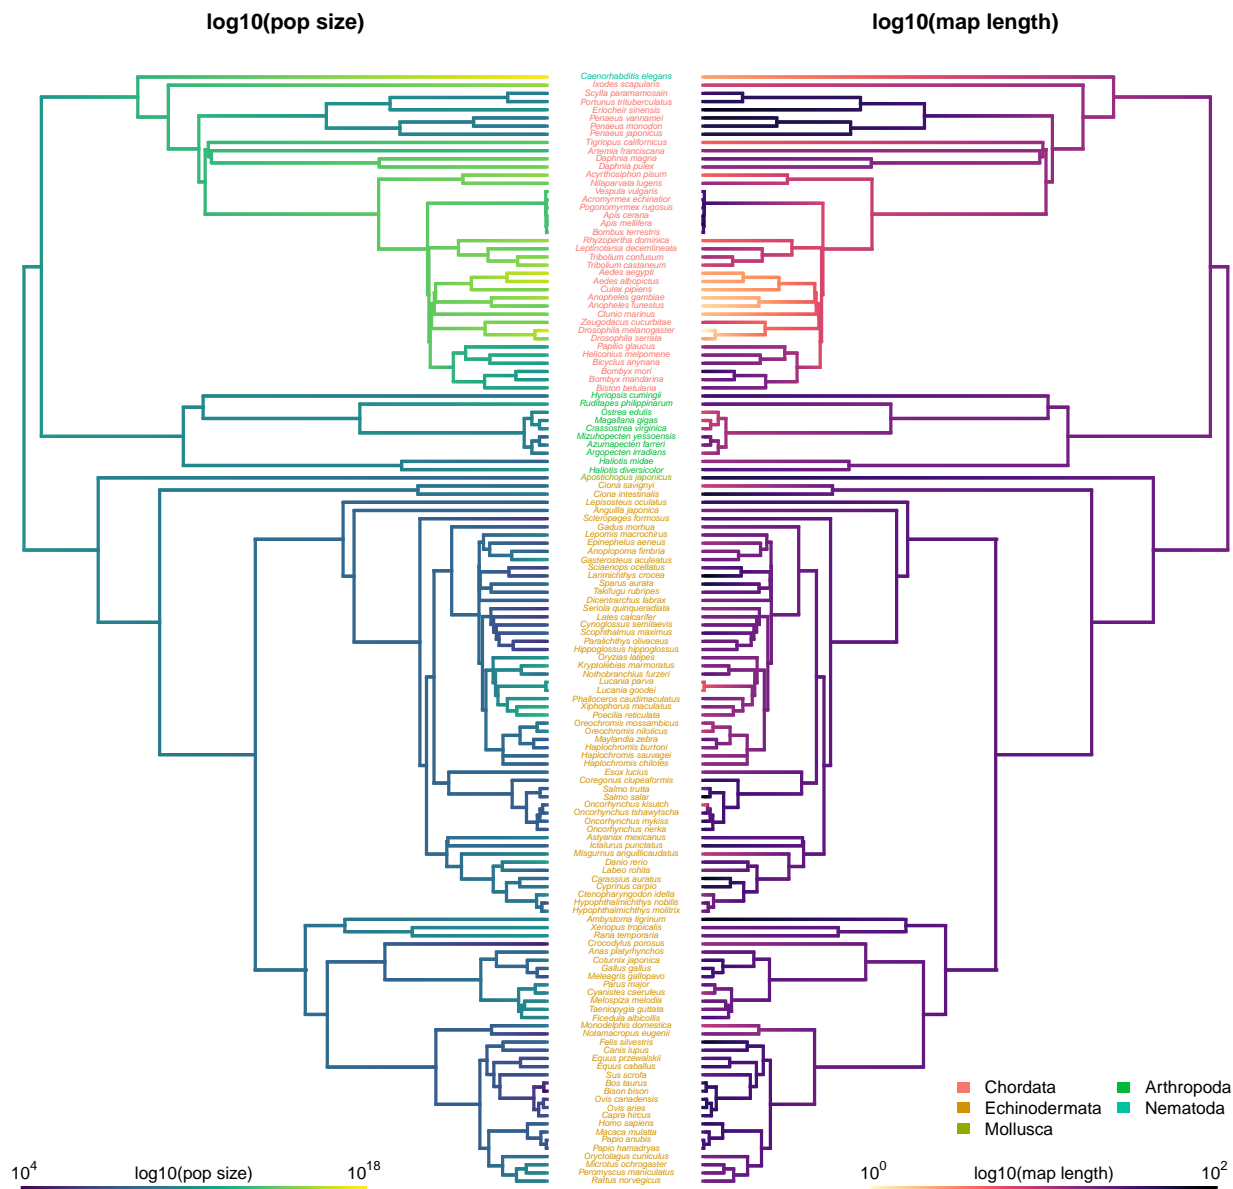

Figure S14
